# Supplementary material for: Predicting H2S solubility in ionic liquids by the quantitative structure–property relationship method using Sσ-profile molecular descriptors
Source: Royal Society of Chemistry journal article supplement (doi:10.1039/c6ra15429h), 2016-01-01
Supplement: c6ra15429h1.xlsx [file c6ra15429h1.xlsx]

## Sheet: H2S solubility in ILs
No.	Data set	Reference	Cation	Anion	T/K	P/bar	Solubility (Exp.)	Solubility (Cal.) of QSPR1	ARD/% (QSPR1)	Solubility (Cal.) of QSPR2	ARD/% (QSPR2)
1	TRAINING	10	C8MIm	PF6	323.15	6.151	0.3022	0.30373	0.50629	0.3022	0
2	TRAINING	4	C4MIm or BMIM	PF6	403.15	96.3	0.643	0.643	0	0.643	0
3	TRAINING	4	C4MIm or BMIM	PF6	373.15	92	0.767	0.76701	0.0013	0.767	0
4	TRAINING	4	C4MIm or BMIM	PF6	373.15	75	0.709	0.70898	0.00282	0.70901	0.00141
5	TRAINING	4	C4MIm or BMIM	PF6	373.15	47	0.555	0.55506	0.01081	0.55499	0.0018
6	TRAINING	12	EMIM or C2MIm	OAc or CH3COO	333.15	1.714	0.307517	0.30887	0.44011	0.30751	0.00214
7	TRAINING	5	EMIM or C2MIm	TFSI or NTf2	343.15	14.99	0.416	0.41494	0.25481	0.41599	0.0024
8	TRAINING	4	C4MIm or BMIM	PF6	403.15	42.1	0.401	0.4011	0.02494	0.40101	0.00249
9	TRAINING	7	C2OHMIM	TfO OR TFMS	333.15	18.39	0.379569	0.38253	0.77187	0.37961	0.00263
10	TRAINING	5	EMIM or C2MIm	PF6	363.15	19.33	0.306	0.3047	0.42484	0.30601	0.00327
11	TRAINING	4	C4MIm or BMIM	PF6	343.15	54	0.792	0.79202	0.00253	0.79196	0.00505
12	TEST	13	EMIM or C2MIm	(C2F5)3PF3 or TPTP	353.15	11.431	0.280601	0.27862	0.70596	0.28062	0.0068
13	TRAINING	5	EMIM or C2MIm	TFSI or NTf2	353.15	16.06	0.398	0.39767	0.08291	0.39796	0.01005
14	TRAINING	15	DMEAH (N11H,CH2OH)	OAc or CH3COO	303.2	0.827	0.1719	0.17194	0.02327	0.17192	0.01163
15	TRAINING	1	C4MIm or BMIM	BF4	333.15	1.95	0.07	0.07026	0.37143	0.06999	0.01429
16	TRAINING	15	DMEAH (N11H,CH2OH)	OAc or CH3COO	303.2	1.108	0.2085	0.2076	0.43165	0.20853	0.01439
17	TRAINING	9	C8MIm	TFSI or NTf2	303.15	8.714	0.5556	0.55663	0.18539	0.55552	0.0144
18	TRAINING	4	C4MIm or BMIM	PF6	403.15	25.3	0.269	0.26843	0.2119	0.26896	0.01487
19	TEST	6	C2OHMIM	BF4	323.15	3.5	0.065	0.06641	2.16923	0.06501	0.01538
20	TRAINING	9	C8MIm	TFSI or NTf2	323.15	13.411	0.5756	0.57606	0.07992	0.57551	0.01564
21	TRAINING	14	C4MIm or BMIM	Br	299.15	1	0.030035	0.03004	0.01665	0.03004	0.01665
22	TEST	8	C6MIm or HMIM	PF6	313.15	5.36	0.233	0.23252	0.20601	0.23304	0.01717
23	TRAINING	7	C2OHMIM	PF6	313.15	8.125	0.226961	0.22554	0.64317	0.22704	0.01762
24	TRAINING	13	EMIM or C2MIm	(C2F5)3PF3 or TPTP	313.15	3.351	0.168095	0.16828	0.11011	0.16813	0.02088
25	TEST	1	C4MIm or BMIM	BF4	303.15	5.24	0.27	0.26628	1.37778	0.27006	0.02222
26	TRAINING	15	DMEAH (N11H,CH2OH)	OAc or CH3COO	313.2	0.823	0.1198	0.12026	0.38397	0.11983	0.02504
27	TEST	7	C2OHMIM	TFSI or NTf2	343.15	4.021	0.114669	0.11966	4.32432	0.11473	0.02616
28	TRAINING	4	C4MIm or BMIM	PF6	313.15	28.9	0.853	0.85308	0.00938	0.85323	0.02696
29	TRAINING	13	EMIM or C2MIm	(C2F5)3PF3 or TPTP	323.15	13.253	0.456406	0.45517	0.27088	0.45628	0.02768
30	TRAINING	13	EMIM or C2MIm	(C2F5)3PF3 or TPTP	353.15	19.415	0.42761	0.42904	0.33439	0.42775	0.03271
31	TRAINING	4	C4MIm or BMIM	PF6	343.15	23.8	0.482	0.48083	0.24274	0.48216	0.0332
32	TRAINING	9	C8MIm	TFSI or NTf2	333.15	9.012	0.4119	0.41261	0.17237	0.41205	0.03642
33	TRAINING	10	C8MIm	PF6	333.15	19.584	0.574	0.57311	0.15505	0.57379	0.03659
34	TRAINING	7	C2OHMIM	PF6	353.15	5.936	0.107357	0.10455	2.65363	0.10736	0.03724
35	TEST	12	EMIM or C2MIm	L-lactate	293.15	0.787	0.289312	0.28744	0.64717	0.28919	0.04229
36	TRAINING	15	DMEAH (N11H,CH2OH)	HCO2	303.2	0.495	0.0704	0.07036	0.05682	0.07043	0.04261
37	TRAINING	4	C4MIm or BMIM	PF6	313.15	6.2	0.267	0.26656	0.16479	0.26712	0.04494
38	TRAINING	12	EMIM or C2MIm	OAc or CH3COO	323.15	2.155	0.360993	0.36219	0.33171	0.36116	0.04639
39	TRAINING	7	C2OHMIM	TFSI or NTf2	343.15	14.38	0.344091	0.34541	0.3807	0.34426	0.0465
40	TRAINING	15	DMEAH (N11H,CH2OH)	HCO2	313.2	0.637	0.0628	0.06334	0.85987	0.06277	0.04777
41	TRAINING	13	EMIM or C2MIm	(C2F5)3PF3 or TPTP	333.15	8.736	0.2902	0.28866	0.53073	0.29034	0.04818
42	TRAINING	5	EMIM or C2MIm	PF6	363.15	13.37	0.223	0.22223	0.34529	0.22289	0.04933
43	TEST	1	C4MIm or BMIM	TFSI or NTf2	333.15	5.83	0.238	0.23645	0.65126	0.23812	0.05042
44	TRAINING	9	C8MIm	TFSI or NTf2	333.15	19.119	0.63	0.63001	0.00159	0.62968	0.05079
45	TRAINING	8	C6MIm or HMIM	PF6	333.15	3.21	0.094	0.09461	0.64894	0.09405	0.05319
46	TRAINING	7	C2OHMIM	PF6	333.15	12.1	0.243977	0.23827	2.34836	0.24387	0.05328
47	TRAINING	8	C6MIm or HMIM	PF6	313.15	2.51	0.108	0.10828	0.25926	0.10794	0.05556
48	TRAINING	3	C4MIm or BMIM	MeSO4	298.1	7.509	0.521	0.52081	0.03647	0.52071	0.05566
49	TEST	7	C2OHMIM	PF6	303.15	5.755	0.19478	0.19454	0.13347	0.19491	0.05647
50	TRAINING	2	C4MIm or BMIM	EtSO4	353.15	12.704	0.086	0.08566	0.39535	0.08595	0.05814
51	TEST	7	C2OHMIM	PF6	313.15	10.41	0.280675	0.28148	0.27788	0.28087	0.06056
52	TEST	9	C6MIm or HMIM	TFSI or NTf2	333.15	17.012	0.5359	0.52867	1.34913	0.53623	0.06158
53	TRAINING	4	C4MIm or BMIM	PF6	298.15	17	0.739	0.74046	0.19756	0.73854	0.06225
54	TRAINING	7	C2OHMIM	TFSI or NTf2	303.15	15.45	0.572355	0.57153	0.15199	0.57276	0.06289
55	TRAINING	5	EMIM or C2MIm	TFSI or NTf2	303.15	3.629	0.221	0.22055	0.20362	0.22086	0.06335
56	TEST	9	C8MIm	TFSI or NTf2	323.15	8.324	0.4309	0.42286	1.86586	0.43118	0.06498
57	TRAINING	13	EMIM or C2MIm	(C2F5)3PF3 or TPTP	303.15	13.957	0.592644	0.59403	0.23386	0.59225	0.06649
58	TRAINING	12	EMIM or C2MIm	L-lactate	313.15	2.157	0.34642	0.34891	0.71869	0.34618	0.06937
59	TRAINING	8	C6MIm or HMIM	BF4	303.15	8.73	0.499	0.50063	0.32665	0.49865	0.07014
60	TRAINING	15	DMEAH (N11H,CH2OH)	OAc or CH3COO	303.2	0.546	0.1261	0.12608	0.01586	0.12619	0.07137
61	TRAINING	6	C2OHMIM	BF4	323.15	5.31	0.097	0.09732	0.3299	0.09693	0.07216
62	TRAINING	9	C8MIm	TFSI or NTf2	323.15	10.731	0.5101	0.50192	1.60361	0.50973	0.07253
63	TRAINING	1	C4MIm or BMIM	PF6	313.15	9.05	0.369	0.36716	0.49864	0.36927	0.07317
64	TRAINING	7	C2OHMIM	PF6	303.15	11.57	0.365934	0.36616	0.07106	0.36563	0.07379
65	TRAINING	15	DMEAH (N11H,CH2OH)	HCO2	313.2	0.528	0.0538	0.05445	1.20818	0.05384	0.07435
66	TRAINING	15	DMEAH (N11H,CH2OH)	HCO2	313.2	0.874	0.0807	0.08069	0.01239	0.08076	0.07435
67	TRAINING	9	C6MIm or HMIM	TFSI or NTf2	353.15	16.95	0.4363	0.43779	0.34151	0.43663	0.07564
68	TRAINING	13	EMIM or C2MIm	(C2F5)3PF3 or TPTP	343.15	13.286	0.347915	0.35169	1.0849	0.34818	0.07604
69	TRAINING	12	C6MIm or HMIM	OAc or CH3COO	303.15	2.874	0.563312	0.56014	0.56318	0.56286	0.08033
70	TRAINING	7	C2OHMIM	PF6	353.15	3.878	0.0719675	0.06946	3.52778	0.07194	0.08333
71	TRAINING	8	C6MIm or HMIM	BF4	303.15	1.11	0.072	0.07149	0.70833	0.07206	0.08333
72	TEST	1	C4MIm or BMIM	TFSI or NTf2	303.15	7.15	0.444	0.44283	0.26351	0.44437	0.08333
73	TRAINING	9	C8MIm	TFSI or NTf2	313.15	7.593	0.4521	0.45221	0.02433	0.45248	0.08405
74	TRAINING	7	C2OHMIM	PF6	303.15	7.42	0.246457	0.24527	0.49899	0.24629	0.08519
75	TRAINING	5	EMIM or C2MIm	PF6	333.15	11.07	0.265	0.27037	2.02642	0.26523	0.08679
76	TEST	10	C8MIm	PF6	333.15	6.76	0.2865	0.28637	0.04538	0.28675	0.08726
77	TRAINING	10	C8MIm	PF6	333.15	16.137	0.5143	0.51616	0.36166	0.51475	0.0875
78	TRAINING	10	C8MIm	PF6	353.15	19.226	0.4672	0.46582	0.29538	0.46678	0.0899
79	TRAINING	9	C6MIm or HMIM	TFSI or NTf2	333.15	14.352	0.4798	0.48004	0.05002	0.47936	0.0917
80	TRAINING	15	MEDAH (CH2OH)2CH3NH	HCO2	303.2	0.837	0.0654	0.06505	0.53517	0.06534	0.09174
81	TRAINING	4	C4MIm or BMIM	PF6	313.15	18.5	0.616	0.61734	0.21753	0.61661	0.09903
82	TRAINING	12	EMIM or C2MIm	L-lactate	303.15	1.188	0.313634	0.31438	0.238	0.31332	0.09997
83	TRAINING	1	C4MIm or BMIM	TFSI or NTf2	333.15	4.19	0.177	0.17737	0.20904	0.17718	0.10169
84	TRAINING	5	EMIM or C2MIm	PF6	343.15	5.16	0.116	0.11831	1.99138	0.11588	0.10345
85	TRAINING	6	C2OHMIM	BF4	353.15	9.64	0.115	0.11597	0.84348	0.11512	0.10435
86	TRAINING	6	C2OHMIM	BF4	313.15	10.66	0.217	0.21456	1.12442	0.21723	0.10599
87	TRAINING	8	C6MIm or HMIM	BF4	303.15	7.33	0.441	0.43889	0.47846	0.44052	0.10884
88	TRAINING	8	C6MIm or HMIM	PF6	333.15	10.4	0.306	0.30501	0.32353	0.30634	0.11111
89	TRAINING	15	DMEAH (N11H,CH2OH)	HCO2	303.2	0.577	0.0791	0.07943	0.41719	0.07919	0.11378
90	TRAINING	6	C2OHMIM	BF4	333.15	6.13	0.096	0.09525	0.78125	0.09589	0.11458
91	TRAINING	15	DMEAH (N11H,CH2OH)	OAc or CH3COO	323.2	0.584	0.0607	0.06062	0.1318	0.06077	0.11532
92	TRAINING	7	C2OHMIM	TfO OR TFMS	323.15	4.896	0.164144	0.16049	2.19988	0.16391	0.11578
93	TRAINING	9	C6MIm or HMIM	TFSI or NTf2	353.15	20.168	0.4922	0.4925	0.06095	0.49163	0.11581
94	TRAINING	15	DMEAH (N11H,CH2OH)	HCO2	323.2	0.817	0.0595	0.05997	0.78992	0.05943	0.11765
95	TRAINING	1	C4MIm or BMIM	TFSI or NTf2	313.15	1.07	0.065	0.06391	1.67692	0.06492	0.12308
96	TEST	15	DMEAH (N11H,CH2OH)	OAc or CH3COO	333.2	0.841	0.0642	0.06455	0.54517	0.06412	0.12461
97	TRAINING	1	C4MIm or BMIM	TFSI or NTf2	333.15	4.94	0.206	0.20497	0.5	0.20574	0.12621
98	TRAINING	7	C2OHMIM	TFSI or NTf2	353.15	4.241	0.109532	0.11023	0.66667	0.10936	0.12785
99	TEST	1	C4MIm or BMIM	TFSI or NTf2	323.15	4.47	0.219	0.21818	0.37443	0.21928	0.12785
100	TEST	13	EMIM or C2MIm	(C2F5)3PF3 or TPTP	323.15	9.397	0.354841	0.35569	0.23916	0.3553	0.12925
101	TRAINING	10	C8MIm	PF6	323.15	4.049	0.2152	0.21731	0.98048	0.21548	0.13011
102	TEST	15	DMEAH (N11H,CH2OH)	HCO2	323.2	0.719	0.0536	0.05396	0.67164	0.05367	0.1306
103	TRAINING	7	C2OHMIM	PF6	353.15	13.56	0.219905	0.22132	0.64575	0.21961	0.13188
104	TRAINING	12	EMIM or C2MIm	CH3CH2CO2	313.15	2.636	0.452671	0.44562	1.55756	0.45328	0.13462
105	TRAINING	10	C8MIm	PF6	323.15	8.262	0.3761	0.37632	0.0585	0.37559	0.1356
106	TEST	7	C2OHMIM	PF6	353.15	8.038	0.14095	0.14042	0.34067	0.1407	0.14194
107	TRAINING	15	DMEAH (N11H,CH2OH)	OAc or CH3COO	323.2	0.674	0.0688	0.06834	0.6686	0.0689	0.14535
108	TRAINING	15	DMEAH (N11H,CH2OH)	OAc or CH3COO	323.2	1.031	0.0984	0.09641	2.02236	0.09855	0.15244
109	TRAINING	5	EMIM or C2MIm	TFSI or NTf2	353.15	12.48	0.328	0.32934	0.40854	0.3275	0.15244
110	TRAINING	15	DMEAH (N11H,CH2OH)	OAc or CH3COO	313.2	0.895	0.1278	0.12842	0.48513	0.1276	0.15649
111	TRAINING	7	C2OHMIM	TFSI or NTf2	313.15	1.704	0.0760201	0.07832	3.05263	0.07588	0.15789
112	TRAINING	12	EMIM or C2MIm	OAc or CH3COO	313.15	1.869	0.374996	0.37629	0.34502	0.37559	0.15835
113	TRAINING	10	C8MIm	PF6	353.15	15.141	0.403	0.40686	0.95782	0.40236	0.15881
114	TRAINING	7	C2OHMIM	TFSI or NTf2	343.15	15.39	0.364136	0.36422	0.03296	0.36351	0.16204
115	TRAINING	7	C2OHMIM	TfO OR TFMS	303.15	16.31	0.548252	0.54993	0.29728	0.54741	0.16232
116	TRAINING	13	EMIM or C2MIm	(C2F5)3PF3 or TPTP	313.15	10.663	0.44101	0.44092	0.02045	0.44173	0.16322
117	TRAINING	7	C2OHMIM	TfO OR TFMS	353.15	17.56	0.294727	0.29475	0.01697	0.29421	0.16627
118	TRAINING	10	C8MIm	PF6	333.15	4.432	0.2033	0.20349	0.09346	0.20364	0.16724
119	TRAINING	13	EMIM or C2MIm	(C2F5)3PF3 or TPTP	323.15	10.328	0.381411	0.38186	0.11783	0.38205	0.16765
120	TRAINING	15	DMEAH (N11H,CH2OH)	OAc or CH3COO	303.2	0.772	0.164	0.16377	0.14024	0.16372	0.17073
121	TRAINING	15	MEDAH (CH2OH)2CH3NH	HCO2	323.2	0.841	0.0404	0.03984	1.38614	0.04047	0.17327
122	TRAINING	15	MEDAH (CH2OH)2CH3NH	OAc or CH3COO	303.2	0.184	0.0345	0.03398	1.50725	0.03444	0.17391
123	TRAINING	8	C6MIm or HMIM	BF4	343.15	10.7	0.345	0.34479	0.06087	0.3444	0.17391
124	TRAINING	1	C4MIm or BMIM	BF4	343.15	7.18	0.203	0.20237	0.31034	0.20264	0.17734
125	TRAINING	15	DMEAH (N11H,CH2OH)	HCO2	313.2	0.993	0.089	0.0883	0.78652	0.08916	0.17978
126	TEST	12	C6MIm or HMIM	OAc or CH3COO	293.15	3.099	0.603621	0.6038	0.0296	0.60473	0.18367
127	TRAINING	7	C2OHMIM	TFSI or NTf2	303.15	13.78	0.529854	0.53107	0.2208	0.53088	0.18494
128	TRAINING	10	C8MIm	PF6	303.15	15.749	0.6972	0.69803	0.11905	0.69849	0.18503
129	TRAINING	12	C6MIm or HMIM	OAc or CH3COO	323.15	2.957	0.487728	0.48654	0.24348	0.48863	0.18504
130	TRAINING	7	C2OHMIM	TFSI or NTf2	313.15	12.24	0.426249	0.42801	0.42468	0.42699	0.18536
131	TRAINING	7	C2OHMIM	PF6	303.15	9.47	0.30712	0.30594	0.37773	0.30653	0.18561
132	TEST	7	C2OHMIM	TfO OR TFMS	303.15	8.292	0.344524	0.34402	0.13933	0.34386	0.18578
133	TRAINING	12	EMIM or C2MIm	CH3CH2CO2	293.15	1.981	0.523581	0.5213	0.43561	0.52258	0.19114
134	TRAINING	13	EMIM or C2MIm	(C2F5)3PF3 or TPTP	323.15	4.827	0.202698	0.20269	0.00394	0.20231	0.19141
135	TRAINING	7	C2OHMIM	TfO OR TFMS	353.15	6.036	0.127693	0.12779	0.07048	0.12795	0.19577
136	TRAINING	7	C2OHMIM	PF6	303.15	12.7	0.396048	0.39761	0.40657	0.39678	0.19697
137	TRAINING	9	C8MIm	TFSI or NTf2	303.15	5.132	0.384	0.38237	0.42448	0.38322	0.20313
138	TRAINING	9	C8MIm	TFSI or NTf2	313.15	9.757	0.5317	0.53211	0.07711	0.53279	0.205
139	TRAINING	15	MEDAH (CH2OH)2CH3NH	HCO2	313.2	0.769	0.0439	0.04365	0.56948	0.04399	0.20501
140	TRAINING	12	EMIM or C2MIm	L-lactate	323.15	2.146	0.313634	0.31149	0.68346	0.31299	0.20519
141	TRAINING	8	C6MIm or HMIM	BF4	313.15	7.09	0.371	0.37308	0.56065	0.37177	0.20755
142	TRAINING	3	C4MIm or BMIM	MeSO4	298.1	0.507	0.077	0.07714	0.18182	0.07684	0.20779
143	TRAINING	5	EMIM or C2MIm	TFSI or NTf2	333.15	4.73	0.178	0.17964	0.92135	0.17763	0.20787
144	TEST	13	EMIM or C2MIm	(C2F5)3PF3 or TPTP	303.15	8.905	0.436101	0.43879	0.61652	0.43702	0.21065
145	TRAINING	7	C2OHMIM	TFSI or NTf2	333.15	18.32	0.450641	0.45135	0.16644	0.44965	0.21083
146	TRAINING	13	EMIM or C2MIm	(C2F5)3PF3 or TPTP	353.15	10.074	0.251989	0.25008	0.75746	0.25252	0.21084
147	TRAINING	15	DMEAH (N11H,CH2OH)	OAc or CH3COO	303.2	0.717	0.1555	0.1552	0.19293	0.15517	0.21222
148	TRAINING	1	C4MIm or BMIM	BF4	303.15	6.24	0.31	0.30833	0.53871	0.31066	0.2129
149	TRAINING	7	C2OHMIM	PF6	313.15	16.85	0.42658	0.42322	0.79231	0.42568	0.21566
150	TRAINING	12	C4MIm or BMIM	OAc or CH3COO	293.15	1.931	0.507091	0.50701	0.01593	0.50599	0.21708
151	TRAINING	7	C2OHMIM	PF6	303.15	4.282	0.147328	0.14765	0.23761	0.14698	0.21724
152	TRAINING	1	C4MIm or BMIM	TFSI or NTf2	343.15	6.4	0.215	0.21587	0.40465	0.21547	0.2186
153	TRAINING	2	C4MIm or BMIM	EtSO4	303.15	9.505	0.118	0.1191	0.9322	0.11774	0.22034
154	TRAINING	12	EMIM or C2MIm	L-lactate	323.15	3.199	0.368727	0.3673	0.38694	0.36955	0.22327
155	TRAINING	13	EMIM or C2MIm	(C2F5)3PF3 or TPTP	323.15	8.498	0.328857	0.32888	0.00711	0.32812	0.22399
156	TEST	15	MEDAH (CH2OH)2CH3NH	OAc or CH3COO	313.2	0.618	0.0625	0.06282	0.512	0.06236	0.224
157	TRAINING	8	C6MIm or HMIM	BF4	313.15	8.72	0.433	0.43357	0.13164	0.432	0.23095
158	TRAINING	7	C2OHMIM	TFSI or NTf2	303.15	7.381	0.332137	0.33256	0.13851	0.33287	0.23186
159	TRAINING	10	C8MIm	PF6	353.15	2.869	0.1027	0.1038	1.07108	0.10294	0.23369
160	TRAINING	12	C6MIm or HMIM	OAc or CH3COO	303.15	1.973	0.514198	0.51527	0.20848	0.51542	0.23765
161	TRAINING	13	EMIM or C2MIm	(C2F5)3PF3 or TPTP	343.15	18.173	0.446806	0.44109	1.27934	0.44573	0.24085
162	TRAINING	13	EMIM or C2MIm	(C2F5)3PF3 or TPTP	333.15	15.891	0.454807	0.45699	0.47988	0.45591	0.24242
163	TRAINING	7	C2OHMIM	TfO OR TFMS	303.15	11.16	0.432208	0.42678	1.25405	0.43115	0.24294
164	TRAINING	9	C6MIm or HMIM	TFSI or NTf2	353.15	3.532	0.1151	0.11555	0.39096	0.11482	0.24327
165	TRAINING	9	C6MIm or HMIM	TFSI or NTf2	323.15	9.748	0.4093	0.41186	0.62546	0.4103	0.24432
166	TRAINING	15	DMEAH (N11H,CH2OH)	HCO2	313.2	1.129	0.0981	0.09601	2.13048	0.09834	0.24465
167	TRAINING	5	EMIM or C2MIm	TFSI or NTf2	323.15	9.998	0.387	0.38532	0.43411	0.38605	0.24548
168	TRAINING	15	DMEAH (N11H,CH2OH)	OAc or CH3COO	323.2	0.916	0.0893	0.08785	1.62374	0.08952	0.24636
169	TRAINING	12	C4MIm or BMIM	OAc or CH3COO	303.15	2.972	0.529088	0.5264	0.50806	0.52777	0.24913
170	TRAINING	7	C2OHMIM	PF6	323.15	5.002	0.127489	0.12958	1.63137	0.12782	0.25098
171	TRAINING	7	C2OHMIM	PF6	353.15	16.83	0.261894	0.26037	0.58419	0.26256	0.252
172	TRAINING	9	C6MIm or HMIM	TFSI or NTf2	303.15	7.703	0.4563	0.45309	0.70348	0.45515	0.25203
173	TEST	10	C8MIm	PF6	353.15	7.902	0.2539	0.24913	1.87869	0.25326	0.25207
174	TRAINING	9	C6MIm or HMIM	TFSI or NTf2	343.15	18.633	0.5131	0.51206	0.20269	0.5144	0.25336
175	TRAINING	15	DMEAH (N11H,CH2OH)	OAc or CH3COO	303.2	0.341	0.0866	0.08624	0.4157	0.08638	0.25404
176	TRAINING	12	EMIM or C2MIm	OAc or CH3COO	333.15	0.492	0.214464	0.21469	0.10518	0.21501	0.25438
177	TRAINING	15	MEDAH (CH2OH)2CH3NH	HCO2	333.2	1.129	0.0427	0.04334	1.49883	0.04281	0.25761
178	TEST	7	C2OHMIM	PF6	323.15	13.92	0.312563	0.31229	0.09917	0.31179	0.25912
179	TRAINING	13	EMIM or C2MIm	(C2F5)3PF3 or TPTP	343.15	2.627	0.0838225	0.08388	0.06854	0.08404	0.25942
180	TRAINING	13	EMIM or C2MIm	(C2F5)3PF3 or TPTP	333.15	6.698	0.233689	0.23066	1.29624	0.23308	0.26067
181	TRAINING	4	C4MIm or BMIM	PF6	298.15	21.2	0.875	0.8768	0.20571	0.87732	0.26514
182	TRAINING	9	C8MIm	TFSI or NTf2	343.15	12.539	0.4717	0.47229	0.12508	0.47296	0.26712
183	TRAINING	5	EMIM or C2MIm	TFSI or NTf2	303.15	14.44	0.609	0.60772	0.21018	0.61063	0.26765
184	TRAINING	9	C6MIm or HMIM	TFSI or NTf2	303.15	8.705	0.4998	0.49785	0.39016	0.50115	0.27011
185	TEST	5	EMIM or C2MIm	TFSI or NTf2	313.15	13.95	0.541	0.54523	0.78189	0.54247	0.27172
186	TEST	15	DMEAH (N11H,CH2OH)	OAc or CH3COO	313.2	0.968	0.1355	0.13635	0.62731	0.13513	0.27306
187	TRAINING	12	C4MIm or BMIM	OAc or CH3COO	323.15	2.484	0.426824	0.4233	0.82561	0.42565	0.27504
188	TRAINING	5	EMIM or C2MIm	PF6	338.15	9.566	0.218	0.2122	2.66055	0.2174	0.27523
189	TRAINING	9	C8MIm	TFSI or NTf2	333.15	11.663	0.4899	0.49406	0.84915	0.49125	0.27557
190	TRAINING	15	DMEAH (N11H,CH2OH)	OAc or CH3COO	323.2	0.472	0.0505	0.05071	0.41584	0.05036	0.27723
191	TRAINING	8	C6MIm or HMIM	PF6	323.15	2.86	0.101	0.1026	1.58416	0.10128	0.27723
192	TRAINING	13	EMIM or C2MIm	(C2F5)3PF3 or TPTP	333.15	9.464	0.310294	0.30806	0.72009	0.30943	0.27858
193	TRAINING	9	C8MIm	TFSI or NTf2	323.15	17.395	0.652	0.65189	0.01687	0.65018	0.27914
194	TRAINING	12	EMIM or C2MIm	L-lactate	303.15	2.994	0.439757	0.43863	0.25635	0.44099	0.28031
195	TRAINING	1	C4MIm or BMIM	PF6	303.15	4.44	0.229	0.22965	0.28384	0.22835	0.28384
196	TRAINING	8	C6MIm or HMIM	TFSI or NTf2	313.15	9.13	0.453	0.45322	0.04857	0.45171	0.28477
197	TRAINING	9	C8MIm	TFSI or NTf2	303.15	0.935	0.0807	0.07984	1.06568	0.08047	0.28501
198	TRAINING	8	C6MIm or HMIM	BF4	323.15	11	0.451	0.44948	0.33703	0.44971	0.28603
199	TRAINING	10	C8MIm	PF6	333.15	9.101	0.3585	0.35548	0.8424	0.35747	0.28731
200	TEST	12	C4MIm or BMIM	OAc or CH3COO	313.15	3.278	0.503647	0.50864	0.99139	0.5051	0.28852
201	TRAINING	15	DMEAH (N11H,CH2OH)	HCO2	323.2	1.045	0.0717	0.07283	1.57601	0.07191	0.29289
202	TRAINING	15	MEDAH (CH2OH)2CH3NH	OAc or CH3COO	303.2	0.713	0.1092	0.11003	0.76007	0.10952	0.29304
203	TRAINING	1	C4MIm or BMIM	PF6	303.15	6.25	0.312	0.31359	0.50962	0.31292	0.29487
204	TRAINING	9	C8MIm	TFSI or NTf2	303.15	15.087	0.7355	0.73324	0.30727	0.73767	0.29504
205	TRAINING	13	EMIM or C2MIm	(C2F5)3PF3 or TPTP	333.15	16.742	0.472204	0.47486	0.56249	0.47081	0.2952
206	TRAINING	6	C2OHMIM	BF4	323.15	6.06	0.111	0.11043	0.51351	0.11067	0.2973
207	TEST	15	MEDAH (CH2OH)2CH3NH	OAc or CH3COO	323.2	0.748	0.0605	0.05992	0.95868	0.06032	0.29752
208	TRAINING	5	EMIM or C2MIm	TFSI or NTf2	313.15	4.017	0.205	0.20516	0.07805	0.20439	0.29756
209	TRAINING	9	C8MIm	TFSI or NTf2	353.15	13.371	0.4576	0.45658	0.2229	0.45622	0.30157
210	TRAINING	12	EMIM or C2MIm	L-lactate	293.15	2.025	0.413849	0.41553	0.40609	0.4151	0.30218
211	TRAINING	4	C4MIm or BMIM	PF6	403.15	11.5	0.135	0.13727	1.68148	0.13541	0.3037
212	TEST	15	DMEAH (N11H,CH2OH)	HCO2	313.2	0.754	0.0721	0.07226	0.22191	0.07188	0.30513
213	TRAINING	5	EMIM or C2MIm	TFSI or NTf2	323.15	4.378	0.19	0.19121	0.63684	0.18942	0.30526
214	TEST	7	C2OHMIM	PF6	303.15	15.08	0.462711	0.46055	0.46466	0.46128	0.30689
215	TRAINING	15	DMEAH (N11H,CH2OH)	OAc or CH3COO	313.2	0.319	0.0552	0.05441	1.43116	0.05537	0.30797
216	TRAINING	7	C2OHMIM	PF6	333.15	14.95	0.291355	0.28804	1.15305	0.2923	0.30885
217	TRAINING	6	C2OHMIM	BF4	323.15	6.75	0.123	0.12273	0.21951	0.12338	0.30894
218	TRAINING	7	C2OHMIM	TfO OR TFMS	343.15	8.6	0.196245	0.19638	0.09174	0.19559	0.31091
219	TEST	8	C6MIm or HMIM	BF4	323.15	10.2	0.424	0.42819	0.98821	0.42532	0.31132
220	TRAINING	12	C6MIm or HMIM	OAc or CH3COO	323.15	2.021	0.443817	0.44564	0.41078	0.4452	0.31164
221	TEST	5	EMIM or C2MIm	PF6	343.15	11.89	0.249	0.247	0.80321	0.24978	0.31325
222	TRAINING	13	EMIM or C2MIm	(C2F5)3PF3 or TPTP	353.15	14.042	0.33341	0.33189	0.45592	0.33236	0.31495
223	TRAINING	12	C4MIm or BMIM	OAc or CH3COO	323.15	3.099	0.454944	0.45561	0.14634	0.45638	0.3156
224	TRAINING	4	C4MIm or BMIM	PF6	298.15	21	0.873	0.87006	0.33677	0.87024	0.31615
225	TRAINING	8	C6MIm or HMIM	BF4	313.15	2.3	0.139	0.1379	0.79137	0.13856	0.31655
226	TRAINING	15	MEDAH (CH2OH)2CH3NH	OAc or CH3COO	313.2	0.858	0.0851	0.08371	1.63337	0.08483	0.31727
227	TRAINING	5	EMIM or C2MIm	PF6	363.15	16.64	0.27	0.27346	1.28148	0.27086	0.31852
228	TEST	5	EMIM or C2MIm	TFSI or NTf2	343.15	11.69	0.345	0.34344	0.45217	0.3439	0.31884
229	TRAINING	15	DMEAH (N11H,CH2OH)	HCO2	303.2	0.864	0.1053	0.10635	0.99715	0.10564	0.32289
230	TRAINING	5	EMIM or C2MIm	TFSI or NTf2	303.15	2.145	0.136	0.13613	0.09559	0.13644	0.32353
231	TEST	15	DMEAH (N11H,CH2OH)	OAc or CH3COO	303.2	0.621	0.1389	0.13931	0.29518	0.13935	0.32397
232	TRAINING	7	C2OHMIM	TFSI or NTf2	333.15	13.46	0.359825	0.36116	0.37799	0.36097	0.32518
233	TRAINING	15	DMEAH (N11H,CH2OH)	OAc or CH3COO	333.2	0.942	0.0707	0.07088	0.2546	0.07093	0.32532
234	TRAINING	10	C8MIm	PF6	313.15	15.274	0.62	0.61622	0.60968	0.61798	0.32581
235	TRAINING	7	C2OHMIM	TFSI or NTf2	323.15	8.847	0.29147	0.29082	0.23328	0.29055	0.3259
236	TRAINING	5	EMIM or C2MIm	TFSI or NTf2	333.15	7.659	0.273	0.27313	0.04762	0.27211	0.32601
237	TRAINING	1	C4MIm or BMIM	TFSI or NTf2	333.15	6.82	0.272	0.27066	0.49265	0.2729	0.33088
238	TRAINING	5	EMIM or C2MIm	PF6	353.15	1.625	0.033	0.02671	19.0606	0.03289	0.33333
239	TRAINING	15	DMEAH (N11H,CH2OH)	HCO2	303.2	1.03	0.1189	0.11841	0.41211	0.1185	0.33642
240	TRAINING	5	EMIM or C2MIm	TFSI or NTf2	313.15	16.28	0.584	0.58553	0.26199	0.58597	0.33733
241	TEST	15	DMEAH (N11H,CH2OH)	HCO2	303.2	0.678	0.0889	0.08977	0.97863	0.0892	0.33746
242	TRAINING	10	C8MIm	PF6	303.15	11.117	0.5905	0.59011	0.06605	0.5885	0.3387
243	TRAINING	6	C2OHMIM	BF4	303.15	6.52	0.174	0.17278	0.70115	0.17341	0.33908
244	TRAINING	1	C4MIm or BMIM	BF4	333.15	4.59	0.15	0.14809	1.27333	0.15051	0.34
245	TRAINING	9	C8MIm	TFSI or NTf2	353.15	10.27	0.3851	0.38744	0.60763	0.38379	0.34017
246	TRAINING	9	C8MIm	TFSI or NTf2	303.15	13.654	0.7045	0.70659	0.29666	0.7021	0.34067
247	TRAINING	7	C2OHMIM	PF6	343.15	15.92	0.275284	0.27679	0.54123	0.27436	0.34145
248	TEST	13	EMIM or C2MIm	(C2F5)3PF3 or TPTP	343.15	9.505	0.269909	0.27106	0.42633	0.26898	0.3443
249	TRAINING	12	EMIM or C2MIm	OAc or CH3COO	333.15	0.213	0.170781	0.17	0.45734	0.17019	0.34608
250	TRAINING	15	DMEAH (N11H,CH2OH)	HCO2	323.2	1.153	0.0776	0.07829	0.88918	0.07733	0.34794
251	TRAINING	13	EMIM or C2MIm	(C2F5)3PF3 or TPTP	313.15	9.656	0.409953	0.41247	0.61399	0.41138	0.3481
252	TRAINING	12	EMIM or C2MIm	OAc or CH3COO	303.15	1.768	0.395012	0.40019	1.31083	0.39639	0.34883
253	TRAINING	8	C6MIm or HMIM	BF4	333.15	1.66	0.063	0.0639	1.42857	0.06322	0.34921
254	TRAINING	8	C6MIm or HMIM	BF4	323.15	8.25	0.363	0.36723	1.16529	0.36427	0.34986
255	TRAINING	12	C4MIm or BMIM	OAc or CH3COO	303.15	1.824	0.464322	0.46731	0.64354	0.46595	0.35064
256	TRAINING	1	C4MIm or BMIM	PF6	323.15	8.93	0.299	0.29943	0.14381	0.30005	0.35117
257	TRAINING	5	EMIM or C2MIm	PF6	353.15	12.65	0.236	0.23569	0.13136	0.23683	0.35169
258	TRAINING	10	C8MIm	PF6	343.15	17.702	0.4928	0.49355	0.15219	0.49454	0.35308
259	TEST	10	C8MIm	PF6	313.15	10.261	0.488	0.49021	0.45287	0.48973	0.35451
260	TRAINING	9	C8MIm	TFSI or NTf2	313.15	12.116	0.5982	0.60251	0.72049	0.60033	0.35607
261	TRAINING	8	C6MIm or HMIM	PF6	303.15	9.17	0.441	0.43931	0.38322	0.44259	0.36054
262	TRAINING	1	C4MIm or BMIM	BF4	333.15	6.39	0.201	0.20274	0.86567	0.20173	0.36318
263	TRAINING	12	EMIM or C2MIm	L-lactate	333.15	1.755	0.250937	0.25008	0.34159	0.25002	0.3655
264	TRAINING	9	C8MIm	TFSI or NTf2	323.15	6.197	0.3473	0.3415	1.67003	0.34603	0.36568
265	TRAINING	15	MEDAH (CH2OH)2CH3NH	OAc or CH3COO	313.2	0.137	0.0164	0.01731	5.54878	0.01634	0.36585
266	TRAINING	12	C4MIm or BMIM	OAc or CH3COO	293.15	2.925	0.564314	0.56592	0.28454	0.56639	0.36783
267	TRAINING	5	EMIM or C2MIm	TFSI or NTf2	303.15	12.44	0.567	0.56796	0.16931	0.5649	0.37037
268	TRAINING	13	EMIM or C2MIm	(C2F5)3PF3 or TPTP	313.15	9.618	0.408672	0.41134	0.65281	0.41019	0.37141
269	TRAINING	1	C4MIm or BMIM	TFSI or NTf2	333.15	3.45	0.148	0.14872	0.48649	0.14745	0.37162
270	TRAINING	5	EMIM or C2MIm	PF6	363.15	5.77	0.102	0.10228	0.27451	0.10162	0.37255
271	TRAINING	15	MEDAH (CH2OH)2CH3NH	HCO2	333.2	0.824	0.0321	0.03174	1.1215	0.03198	0.37383
272	TRAINING	7	C2OHMIM	TfO OR TFMS	343.15	11.98	0.25404	0.24862	2.11811	0.25305	0.37402
273	TRAINING	15	MEDAH (CH2OH)2CH3NH	OAc or CH3COO	313.2	1.267	0.1174	0.11736	0.03407	0.11696	0.37479
274	TRAINING	1	C4MIm or BMIM	PF6	323.15	2.57	0.096	0.09549	0.53125	0.09564	0.375
275	TRAINING	7	C2OHMIM	PF6	303.15	2.806	0.0981566	0.09897	0.78411	0.09783	0.37678
276	TRAINING	8	C6MIm or HMIM	PF6	323.15	6.11	0.222	0.22064	0.61261	0.22284	0.37838
277	TEST	10	C8MIm	PF6	303.15	6.542	0.4138	0.41589	0.50507	0.41537	0.37941
278	TRAINING	5	EMIM or C2MIm	PF6	343.15	14.74	0.3	0.30293	0.97667	0.29885	0.38333
279	TEST	8	C6MIm or HMIM	PF6	333.15	6.89	0.211	0.21081	0.09005	0.21181	0.38389
280	TRAINING	9	C6MIm or HMIM	TFSI or NTf2	313.15	15.74	0.6477	0.63969	1.23668	0.64521	0.38444
281	TRAINING	15	DMEAH (N11H,CH2OH)	HCO2	323.2	0.602	0.0467	0.04647	0.49251	0.04652	0.38544
282	TRAINING	9	C6MIm or HMIM	TFSI or NTf2	343.15	15.683	0.4571	0.46083	0.81601	0.45533	0.38722
283	TRAINING	12	EMIM or C2MIm	L-lactate	293.15	3.205	0.489783	0.49231	0.51593	0.49169	0.38935
284	TRAINING	12	EMIM or C2MIm	L-lactate	333.15	0.533	0.146762	0.14584	0.62834	0.14619	0.38986
285	TRAINING	7	C2OHMIM	TfO OR TFMS	323.15	16.8	0.409713	0.40489	1.17403	0.4113	0.39053
286	TEST	10	C8MIm	PF6	323.15	14.501	0.5361	0.53877	0.49804	0.53825	0.40104
287	TRAINING	7	C2OHMIM	PF6	313.15	14.07	0.365606	0.36523	0.1012	0.36413	0.40208
288	TRAINING	15	DMEAH (N11H,CH2OH)	OAc or CH3COO	303.2	0.464	0.1114	0.11079	0.54758	0.11095	0.40395
289	TEST	12	EMIM or C2MIm	CH3CH2CO2	293.15	2.959	0.579824	0.58176	0.33382	0.58218	0.40625
290	TRAINING	4	C4MIm or BMIM	PF6	343.15	15.9	0.364	0.36768	1.01099	0.36548	0.40659
291	TRAINING	7	C2OHMIM	TfO OR TFMS	333.15	15.26	0.340704	0.3385	0.64573	0.34209	0.40798
292	TRAINING	5	EMIM or C2MIm	TFSI or NTf2	303.15	5.816	0.33	0.33078	0.23636	0.33135	0.40909
293	TRAINING	5	EMIM or C2MIm	PF6	333.15	15.8	0.359	0.35396	1.4039	0.35752	0.41226
294	TRAINING	7	C2OHMIM	TfO OR TFMS	333.15	8.003	0.213701	0.21751	1.78287	0.21281	0.41647
295	TRAINING	7	C2OHMIM	PF6	333.15	1.646	0.0382087	0.034	10.9948	0.03804	0.41885
296	TRAINING	15	MEDAH (CH2OH)2CH3NH	OAc or CH3COO	323.2	0.87	0.0692	0.06898	0.31792	0.06949	0.41908
297	TRAINING	12	EMIM or C2MIm	OAc or CH3COO	323.15	0.756	0.265254	0.26341	0.69536	0.26638	0.42432
298	TRAINING	9	C8MIm	TFSI or NTf2	313.15	5.686	0.3674	0.36781	0.11159	0.36583	0.42733
299	TRAINING	12	EMIM or C2MIm	CH3CH2CO2	293.15	0.798	0.416232	0.41981	0.85966	0.41802	0.42961
300	TRAINING	9	C6MIm or HMIM	TFSI or NTf2	303.15	13.578	0.6619	0.66547	0.53936	0.66476	0.43209
301	TRAINING	1	C4MIm or BMIM	BF4	303.15	7.36	0.354	0.35785	1.08757	0.35553	0.4322
302	TRAINING	10	C8MIm	PF6	313.15	18.618	0.675	0.67751	0.37185	0.67792	0.43259
303	TRAINING	13	EMIM or C2MIm	(C2F5)3PF3 or TPTP	313.15	12.507	0.493367	0.48742	1.2054	0.49123	0.43316
304	TRAINING	1	C4MIm or BMIM	TFSI or NTf2	313.15	2.79	0.163	0.16186	0.69939	0.16229	0.43558
305	TRAINING	9	C8MIm	TFSI or NTf2	303.15	6.824	0.4753	0.47261	0.56596	0.47322	0.43762
306	TRAINING	9	C8MIm	TFSI or NTf2	333.15	6.706	0.3305	0.33267	0.65658	0.32905	0.43873
307	TRAINING	10	C8MIm	PF6	353.15	10.693	0.3188	0.31554	1.02258	0.3202	0.43915
308	TRAINING	9	C8MIm	TFSI or NTf2	343.15	15.771	0.5357	0.53531	0.0728	0.53806	0.44055
309	TRAINING	10	C8MIm	PF6	333.15	1.114	0.0522	0.04742	9.15709	0.05197	0.44061
310	TRAINING	8	C6MIm or HMIM	BF4	333.15	9.47	0.354	0.35589	0.5339	0.35556	0.44068
311	TRAINING	1	C4MIm or BMIM	TFSI or NTf2	303.15	8.26	0.51	0.50625	0.73529	0.50775	0.44118
312	TRAINING	12	EMIM or C2MIm	L-lactate	303.15	2.281	0.398675	0.39671	0.49292	0.39691	0.44275
313	TRAINING	8	C6MIm or HMIM	PF6	303.15	6.85	0.345	0.34688	0.54493	0.34653	0.44348
314	TRAINING	7	C2OHMIM	TFSI or NTf2	313.15	11.48	0.409269	0.40792	0.33716	0.40745	0.45199
315	TRAINING	7	C2OHMIM	PF6	323.15	11.29	0.260408	0.26055	0.0576	0.25922	0.45315
316	TRAINING	13	EMIM or C2MIm	(C2F5)3PF3 or TPTP	303.15	12.326	0.548426	0.54508	0.61004	0.54594	0.45323
317	TRAINING	7	C2OHMIM	PF6	333.15	16.44	0.317922	0.32011	0.69519	0.31645	0.45612
318	TRAINING	15	DMEAH (N11H,CH2OH)	HCO2	323.2	0.934	0.0657	0.06678	1.64384	0.066	0.45662
319	TRAINING	7	C2OHMIM	TFSI or NTf2	323.15	16.91	0.471569	0.47024	0.28838	0.47376	0.45802
320	TRAINING	15	MEDAH (CH2OH)2CH3NH	HCO2	323.2	0.418	0.0217	0.02276	4.88479	0.0218	0.46083
321	TRAINING	4	C4MIm or BMIM	PF6	343.15	8	0.21	0.20694	1.45714	0.20903	0.4619
322	TEST	13	EMIM or C2MIm	(C2F5)3PF3 or TPTP	343.15	3.855	0.121986	0.12219	0.16738	0.12255	0.4625
323	TRAINING	7	C2OHMIM	TFSI or NTf2	313.15	15.44	0.499062	0.49983	0.14626	0.49676	0.46884
324	TEST	5	EMIM or C2MIm	TFSI or NTf2	303.15	8.115	0.427	0.42945	0.57377	0.42901	0.47073
325	TRAINING	8	C6MIm or HMIM	BF4	313.15	9.43	0.46	0.45834	0.36087	0.45783	0.47174
326	TRAINING	12	C6MIm or HMIM	OAc or CH3COO	293.15	2.123	0.548729	0.54795	0.14197	0.54614	0.47183
327	TRAINING	12	EMIM or C2MIm	L-lactate	313.15	0.571	0.199423	0.19455	2.44338	0.19848	0.4727
328	TRAINING	1	C4MIm or BMIM	PF6	333.15	2.29	0.065	0.06577	1.18462	0.06531	0.47692
329	TRAINING	15	DMEAH (N11H,CH2OH)	OAc or CH3COO	323.2	0.377	0.0415	0.04207	1.37349	0.0413	0.48193
330	TRAINING	5	EMIM or C2MIm	PF6	363.15	8.222	0.143	0.13963	2.35664	0.14231	0.48252
331	TRAINING	6	C2OHMIM	BF4	343.15	5.18	0.07	0.06983	0.24286	0.07034	0.48571
332	TEST	8	C6MIm or HMIM	BF4	303.15	1.96	0.144	0.14451	0.35417	0.1433	0.48611
333	TEST	9	C8MIm	TFSI or NTf2	333.15	14.635	0.5544	0.57124	3.03752	0.55713	0.49242
334	TRAINING	15	DMEAH (N11H,CH2OH)	OAc or CH3COO	313.2	0.445	0.0728	0.07225	0.75549	0.07316	0.49451
335	TRAINING	8	C6MIm or HMIM	PF6	323.15	4.08	0.149	0.14754	0.97987	0.14826	0.49664
336	TEST	7	C2OHMIM	PF6	333.15	7.209	0.156525	0.15884	1.49521	0.15728	0.4984
337	TRAINING	13	EMIM or C2MIm	(C2F5)3PF3 or TPTP	323.15	2.016	0.0902201	0.0898	0.46559	0.08977	0.49884
338	TEST	7	C2OHMIM	TFSI or NTf2	303.15	11.07	0.456598	0.4557	0.19711	0.45432	0.49934
339	TRAINING	15	DMEAH (N11H,CH2OH)	OAc or CH3COO	333.2	0.181	0.018	0.0172	4.44444	0.01809	0.5
340	TRAINING	10	C8MIm	PF6	313.15	12.811	0.5584	0.5603	0.34026	0.5612	0.50143
341	TEST	4	C4MIm or BMIM	PF6	298.15	20	0.84	0.83684	0.37619	0.83576	0.50476
342	TRAINING	7	C2OHMIM	TFSI or NTf2	303.15	10.34	0.434182	0.43331	0.20497	0.432	0.50668
343	TRAINING	7	C2OHMIM	TFSI or NTf2	353.15	15.26	0.3283	0.3271	0.36552	0.32999	0.51477
344	TRAINING	12	C6MIm or HMIM	OAc or CH3COO	333.15	0.778	0.328536	0.32876	0.0683	0.33023	0.51574
345	TRAINING	15	MEDAH (CH2OH)2CH3NH	OAc or CH3COO	323.2	1.153	0.0886	0.08991	1.47856	0.08814	0.51919
346	TRAINING	5	EMIM or C2MIm	TFSI or NTf2	313.15	9.078	0.407	0.40568	0.32432	0.40912	0.52088
347	TRAINING	15	MEDAH (CH2OH)2CH3NH	OAc or CH3COO	313.2	1.128	0.1067	0.10615	0.51546	0.10726	0.52484
348	TRAINING	13	EMIM or C2MIm	(C2F5)3PF3 or TPTP	303.15	7.2	0.377081	0.37643	0.17276	0.3751	0.52547
349	TRAINING	9	C8MIm	TFSI or NTf2	353.15	7.624	0.3048	0.30589	0.35761	0.30642	0.5315
350	TRAINING	1	C4MIm or BMIM	PF6	323.15	3.8	0.139	0.13824	0.54676	0.13826	0.53237
351	TEST	12	C4MIm or BMIM	OAc or CH3COO	303.15	0.849	0.378976	0.38068	0.44958	0.38101	0.53665
352	TRAINING	13	EMIM or C2MIm	(C2F5)3PF3 or TPTP	343.15	7.175	0.215911	0.21462	0.59773	0.21475	0.53752
353	TRAINING	1	C4MIm or BMIM	TFSI or NTf2	303.15	1.77	0.128	0.12876	0.59375	0.12869	0.53906
354	TRAINING	5	EMIM or C2MIm	TFSI or NTf2	303.15	10.25	0.506	0.50575	0.04941	0.50327	0.53953
355	TRAINING	13	EMIM or C2MIm	(C2F5)3PF3 or TPTP	343.15	2.82	0.0897134	0.09006	0.38636	0.0902	0.54241
356	TRAINING	15	MEDAH (CH2OH)2CH3NH	HCO2	323.2	1.242	0.0589	0.05828	1.05263	0.05858	0.54329
357	TRAINING	6	C2OHMIM	BF4	313.15	9.69	0.202	0.20383	0.90594	0.2031	0.54455
358	TRAINING	6	C2OHMIM	BF4	323.15	10.03	0.176	0.17596	0.02273	0.17504	0.54545
359	TRAINING	8	C6MIm or HMIM	PF6	313.15	6.65	0.284	0.28437	0.13028	0.28555	0.54577
360	TRAINING	8	C6MIm or HMIM	PF6	303.15	5.72	0.296	0.29656	0.18919	0.29438	0.5473
361	TRAINING	8	C6MIm or HMIM	BF4	333.15	5.1	0.212	0.20973	1.07075	0.21317	0.55189
362	TRAINING	15	DMEAH (N11H,CH2OH)	OAc or CH3COO	313.2	1.041	0.1431	0.14394	0.587	0.1423	0.55905
363	TRAINING	7	C2OHMIM	PF6	313.15	12.8	0.333507	0.33704	1.06147	0.33537	0.56072
364	TEST	12	EMIM or C2MIm	OAc or CH3COO	293.15	1.737	0.426602	0.43208	1.28421	0.429	0.56223
365	TEST	15	DMEAH (N11H,CH2OH)	OAc or CH3COO	303.2	0.29	0.076	0.0755	0.65789	0.07557	0.56579
366	TRAINING	9	C8MIm	TFSI or NTf2	323.15	4.153	0.2472	0.24766	0.18608	0.2486	0.56634
367	TRAINING	13	EMIM or C2MIm	(C2F5)3PF3 or TPTP	343.15	15.882	0.399308	0.40119	0.47134	0.40158	0.56901
368	TRAINING	5	EMIM or C2MIm	TFSI or NTf2	313.15	11.52	0.481	0.48308	0.43243	0.48374	0.56965
369	TEST	12	EMIM or C2MIm	L-lactate	303.15	1.887	0.371032	0.37375	0.73244	0.37315	0.57073
370	TEST	9	C8MIm	TFSI or NTf2	313.15	3.815	0.2626	0.26787	2.00685	0.2641	0.57121
371	TRAINING	7	C2OHMIM	TfO OR TFMS	303.15	2.547	0.123894	0.127	2.50202	0.12461	0.57304
372	TEST	15	DMEAH (N11H,CH2OH)	OAc or CH3COO	323.2	0.789	0.0785	0.07785	0.82803	0.07895	0.57325
373	TRAINING	7	C2OHMIM	PF6	343.15	5.652	0.112744	0.11523	2.2449	0.11335	0.57675
374	TRAINING	7	C2OHMIM	TFSI or NTf2	323.15	5.816	0.202651	0.20292	0.10853	0.20153	0.57721
375	TRAINING	8	C6MIm or HMIM	PF6	343.15	3.55	0.088	0.0902	2.5	0.08851	0.57955
376	TRAINING	13	EMIM or C2MIm	(C2F5)3PF3 or TPTP	313.15	1.764	0.0917826	0.08946	2.5305	0.09125	0.58023
377	TEST	9	C8MIm	TFSI or NTf2	303.15	10.755	0.6222	0.63028	1.29862	0.62582	0.58181
378	TRAINING	9	C6MIm or HMIM	TFSI or NTf2	323.15	11.091	0.4518	0.45696	1.1421	0.45445	0.58654
379	TRAINING	1	C4MIm or BMIM	TFSI or NTf2	323.15	5.21	0.252	0.24936	1.04762	0.25052	0.5873
380	TEST	5	EMIM or C2MIm	TFSI or NTf2	323.15	7.063	0.291	0.28961	0.47766	0.28929	0.58763
381	TRAINING	8	C6MIm or HMIM	BF4	303.15	5.99	0.38	0.38062	0.16316	0.38224	0.58947
382	TRAINING	7	C2OHMIM	TFSI or NTf2	313.15	8.136	0.309407	0.30901	0.12605	0.31123	0.59147
383	TRAINING	15	DMEAH (N11H,CH2OH)	OAc or CH3COO	303.2	0.393	0.0976	0.09685	0.76844	0.09702	0.59426
384	TRAINING	10	C8MIm	PF6	333.15	12.781	0.4461	0.44633	0.05156	0.44876	0.59628
385	TRAINING	2	C4MIm or BMIM	EtSO4	313.15	6.368	0.075	0.07541	0.54667	0.07545	0.6
386	TRAINING	10	C8MIm	PF6	343.15	4.803	0.1921	0.19463	1.31702	0.19094	0.60385
387	TEST	12	EMIM or C2MIm	L-lactate	293.15	2.293	0.433401	0.43161	0.41326	0.43078	0.60476
388	TRAINING	15	MEDAH (CH2OH)2CH3NH	OAc or CH3COO	303.2	1.179	0.1618	0.1605	0.80346	0.16082	0.60569
389	TRAINING	15	DMEAH (N11H,CH2OH)	OAc or CH3COO	303.2	0.915	0.1832	0.18421	0.55131	0.18431	0.6059
390	TRAINING	5	EMIM or C2MIm	TFSI or NTf2	313.15	6.445	0.309	0.30829	0.22977	0.31088	0.60841
391	TRAINING	4	C4MIm or BMIM	PF6	373.15	9.6	0.161	0.16097	0.01863	0.16002	0.6087
392	TRAINING	5	EMIM or C2MIm	PF6	338.15	16.44	0.348	0.34923	0.35345	0.35012	0.6092
393	TRAINING	12	EMIM or C2MIm	CH3CH2CO2	303.15	1.981	0.466968	0.46138	1.19673	0.46412	0.60997
394	TEST	12	EMIM or C2MIm	L-lactate	313.15	3.187	0.404057	0.40733	0.81005	0.40159	0.61054
395	TRAINING	9	C6MIm or HMIM	TFSI or NTf2	333.15	12.235	0.4288	0.42547	0.77659	0.42618	0.61101
396	TRAINING	4	C4MIm or BMIM	PF6	298.15	11	0.54	0.54179	0.33148	0.54332	0.61481
397	TRAINING	8	C6MIm or HMIM	BF4	313.15	10.4	0.491	0.49111	0.0224	0.49402	0.61507
398	TRAINING	13	EMIM or C2MIm	(C2F5)3PF3 or TPTP	353.15	6.414	0.169593	0.16887	0.42653	0.16855	0.61521
399	TEST	10	C8MIm	PF6	343.15	13.997	0.4253	0.42694	0.38561	0.42792	0.61604
400	TRAINING	12	EMIM or C2MIm	L-lactate	333.15	2.943	0.313634	0.31192	0.54636	0.3117	0.6165
401	TRAINING	5	EMIM or C2MIm	TFSI or NTf2	343.15	5.06	0.167	0.16785	0.50898	0.16597	0.61677
402	TRAINING	13	EMIM or C2MIm	(C2F5)3PF3 or TPTP	333.15	2.302	0.0866151	0.08638	0.27142	0.08608	0.61778
403	TRAINING	7	C2OHMIM	PF6	353.15	10.51	0.178031	0.17961	0.90449	0.1769	0.61798
404	TRAINING	15	DMEAH (N11H,CH2OH)	OAc or CH3COO	333.2	0.728	0.0566	0.0571	0.88339	0.05625	0.61837
405	TRAINING	15	DMEAH (N11H,CH2OH)	HCO2	323.2	0.259	0.0242	0.02312	4.46281	0.02405	0.61983
406	TRAINING	6	C2OHMIM	BF4	333.15	4.95	0.077	0.07874	2.25974	0.07748	0.62338
407	TRAINING	5	EMIM or C2MIm	PF6	363.15	3.536	0.064	0.06614	3.34375	0.0636	0.625
408	TEST	15	DMEAH (N11H,CH2OH)	OAc or CH3COO	303.2	1.002	0.1945	0.19536	0.44216	0.19572	0.62725
409	TEST	13	EMIM or C2MIm	(C2F5)3PF3 or TPTP	333.15	11.836	0.365698	0.36701	0.35876	0.368	0.62947
410	TEST	7	C2OHMIM	TfO OR TFMS	353.15	12.77	0.236581	0.23522	0.58326	0.23809	0.62975
411	TRAINING	10	C8MIm	PF6	313.15	7.401	0.3949	0.39299	0.48367	0.39241	0.63054
412	TRAINING	13	EMIM or C2MIm	(C2F5)3PF3 or TPTP	323.15	6.503	0.261179	0.26363	0.9384	0.26284	0.63592
413	TRAINING	7	C2OHMIM	PF6	323.15	6.756	0.168171	0.1691	0.53508	0.16713	0.63615
414	TRAINING	6	C2OHMIM	BF4	303.15	10.27	0.247	0.24445	1.03239	0.24542	0.63968
415	TRAINING	7	C2OHMIM	TFSI or NTf2	313.15	3.284	0.142199	0.13973	1.73699	0.14129	0.63994
416	TRAINING	15	DMEAH (N11H,CH2OH)	OAc or CH3COO	313.2	0.382	0.064	0.06344	0.875	0.06441	0.64062
417	TRAINING	15	DMEAH (N11H,CH2OH)	HCO2	333.2	0.922	0.0464	0.04627	0.28017	0.0467	0.64655
418	TRAINING	13	EMIM or C2MIm	(C2F5)3PF3 or TPTP	343.15	10.85	0.29971	0.30108	0.457	0.29777	0.6474
419	TRAINING	12	EMIM or C2MIm	OAc or CH3COO	293.15	1.962	0.441323	0.44293	0.36402	0.43845	0.65111
420	TRAINING	5	EMIM or C2MIm	TFSI or NTf2	323.15	12.74	0.465	0.46324	0.37849	0.46195	0.65591
421	TEST	1	C4MIm or BMIM	PF6	323.15	5.27	0.189	0.18746	0.81481	0.18776	0.65608
422	TRAINING	13	EMIM or C2MIm	(C2F5)3PF3 or TPTP	343.15	2.149	0.069118	0.06833	1.1401	0.06866	0.66266
423	TRAINING	1	C4MIm or BMIM	BF4	313.15	5.68	0.25	0.25325	1.3	0.25166	0.664
424	TRAINING	9	C6MIm or HMIM	TFSI or NTf2	303.15	15.043	0.7012	0.70072	0.06845	0.69654	0.66458
425	TRAINING	7	C2OHMIM	TFSI or NTf2	333.15	14.4	0.382371	0.38088	0.39749	0.37985	0.66684
426	TRAINING	12	EMIM or C2MIm	L-lactate	303.15	1.544	0.345564	0.34883	0.94517	0.34787	0.66737
427	TRAINING	12	EMIM or C2MIm	L-lactate	303.15	2.648	0.420985	0.4169	0.97038	0.41816	0.67108
428	TRAINING	7	C2OHMIM	TfO OR TFMS	333.15	11.17	0.273353	0.2783	1.79225	0.27524	0.67301
429	TRAINING	10	C8MIm	PF6	353.15	5.156	0.1749	0.17535	0.25729	0.17608	0.67467
430	TRAINING	4	C4MIm or BMIM	PF6	298.15	1.15	0.077	0.0761	1.16883	0.07648	0.67532
431	TEST	12	EMIM or C2MIm	OAc or CH3COO	333.15	2.966	0.36671	0.36225	1.21611	0.36422	0.6789
432	TRAINING	1	C4MIm or BMIM	PF6	323.15	6.5	0.229	0.22686	0.9345	0.22744	0.68122
433	TRAINING	1	C4MIm or BMIM	TFSI or NTf2	313.15	2	0.12	0.11841	1.325	0.11918	0.68333
434	TRAINING	5	EMIM or C2MIm	TFSI or NTf2	303.15	1.077	0.07	0.06955	0.64286	0.07048	0.68571
435	TRAINING	9	C8MIm	TFSI or NTf2	343.15	9.655	0.3952	0.39213	0.77682	0.39249	0.68573
436	TRAINING	9	C8MIm	TFSI or NTf2	343.15	2.748	0.1382	0.13758	0.44863	0.13915	0.68741
437	TEST	6	C2OHMIM	BF4	333.15	3.94	0.062	0.06427	3.66129	0.06157	0.69355
438	TEST	13	EMIM or C2MIm	(C2F5)3PF3 or TPTP	313.15	13.195	0.510924	0.5034	1.47267	0.50738	0.69369
439	TRAINING	10	C8MIm	PF6	323.15	11.543	0.4666	0.46939	0.59794	0.46985	0.69653
440	TRAINING	15	MEDAH (CH2OH)2CH3NH	HCO2	333.2	0.967	0.0373	0.03707	0.61662	0.03756	0.69705
441	TRAINING	12	EMIM or C2MIm	CH3CH2CO2	323.15	0.467	0.318359	0.31637	0.62484	0.31614	0.69708
442	TRAINING	13	EMIM or C2MIm	(C2F5)3PF3 or TPTP	313.15	5.642	0.266065	0.27077	1.76844	0.26792	0.69727
443	TRAINING	13	EMIM or C2MIm	(C2F5)3PF3 or TPTP	323.15	2.615	0.115507	0.11475	0.65528	0.1147	0.69857
444	TRAINING	15	MEDAH (CH2OH)2CH3NH	HCO2	323.2	0.706	0.0343	0.03427	0.08746	0.03406	0.69971
445	TRAINING	12	EMIM or C2MIm	OAc or CH3COO	313.15	3.192	0.438494	0.43084	1.74542	0.43542	0.70094
446	TRAINING	15	MEDAH (CH2OH)2CH3NH	HCO2	313.2	1.03	0.0588	0.05834	0.78231	0.05838	0.71429
447	TRAINING	12	C4MIm or BMIM	OAc or CH3COO	323.15	2.774	0.440183	0.43489	1.20253	0.43702	0.71865
448	TRAINING	13	EMIM or C2MIm	(C2F5)3PF3 or TPTP	333.15	2.137	0.0805899	0.08051	0.09919	0.08001	0.71962
449	TRAINING	7	C2OHMIM	TfO OR TFMS	323.15	13.98	0.368752	0.37052	0.46638	0.36614	0.72126
450	TRAINING	12	C4MIm or BMIM	OAc or CH3COO	313.15	0.811	0.350089	0.35186	0.50585	0.35262	0.72293
451	TRAINING	8	C6MIm or HMIM	TFSI or NTf2	333.15	9.29	0.335	0.33439	0.18209	0.33743	0.72537
452	TRAINING	5	EMIM or C2MIm	TFSI or NTf2	343.15	2.963	0.101	0.10248	1.46535	0.10174	0.73267
453	TEST	12	EMIM or C2MIm	CH3CH2CO2	313.15	2.983	0.470349	0.47278	0.51678	0.4738	0.73364
454	TRAINING	5	EMIM or C2MIm	TFSI or NTf2	353.15	5.375	0.158	0.15613	1.18354	0.15916	0.73418
455	TRAINING	10	C8MIm	PF6	343.15	7.345	0.2717	0.27216	0.1693	0.26968	0.74347
456	TRAINING	13	EMIM or C2MIm	(C2F5)3PF3 or TPTP	303.15	12.038	0.533378	0.53658	0.60037	0.53736	0.74661
457	TEST	5	EMIM or C2MIm	PF6	363.15	11.12	0.187	0.1853	0.90909	0.1884	0.74866
458	TEST	7	C2OHMIM	TfO OR TFMS	333.15	5.298	0.150813	0.15344	1.75066	0.15193	0.74934
459	TRAINING	2	C4MIm or BMIM	EtSO4	323.15	11.122	0.1	0.09981	0.19	0.10075	0.75
460	TRAINING	5	EMIM or C2MIm	PF6	333.15	6.852	0.172	0.17052	0.86047	0.17329	0.75
461	TRAINING	15	DMEAH (N11H,CH2OH)	HCO2	303.2	0.77	0.0969	0.09837	1.51703	0.09763	0.75335
462	TRAINING	13	EMIM or C2MIm	(C2F5)3PF3 or TPTP	333.15	14.996	0.435109	0.43793	0.64829	0.4384	0.75631
463	TRAINING	5	EMIM or C2MIm	PF6	343.15	7.32	0.161	0.15825	1.70807	0.16222	0.75776
464	TRAINING	12	C6MIm or HMIM	OAc or CH3COO	313.15	1.923	0.478785	0.47687	0.39987	0.47515	0.75911
465	TEST	7	C2OHMIM	PF6	343.15	12.86	0.231487	0.22796	1.52916	0.23326	0.76026
466	TRAINING	15	DMEAH (N11H,CH2OH)	HCO2	323.2	0.502	0.0405	0.03985	1.60494	0.04019	0.76543
467	TEST	1	C4MIm or BMIM	BF4	313.15	2.21	0.111	0.11225	1.12613	0.11185	0.76577
468	TRAINING	9	C8MIm	TFSI or NTf2	323.15	2.394	0.1497	0.15005	0.2338	0.15085	0.7682
469	TRAINING	10	C8MIm	PF6	323.15	17.415	0.5977	0.59612	0.26435	0.59309	0.77129
470	TRAINING	1	C4MIm or BMIM	TFSI or NTf2	343.15	5.42	0.19	0.18868	0.69474	0.18853	0.77368
471	TEST	5	EMIM or C2MIm	TFSI or NTf2	353.15	8.745	0.243	0.24065	0.96708	0.24111	0.77778
472	TRAINING	8	C6MIm or HMIM	PF6	333.15	8.6	0.259	0.25979	0.30502	0.26102	0.77992
473	TRAINING	7	C2OHMIM	TfO OR TFMS	323.15	3.093	0.108798	0.10543	3.09743	0.10795	0.78125
474	TRAINING	1	C4MIm or BMIM	BF4	303.15	3.28	0.183	0.1841	0.60109	0.18443	0.78142
475	TRAINING	1	C4MIm or BMIM	PF6	313.15	3.13	0.142	0.14123	0.54225	0.14089	0.78169
476	TRAINING	1	C4MIm or BMIM	TFSI or NTf2	323.15	3.79	0.188	0.18854	0.28723	0.18947	0.78191
477	TRAINING	10	C8MIm	PF6	303.15	13.165	0.6501	0.64488	0.80295	0.64501	0.78296
478	TRAINING	6	C2OHMIM	BF4	303.15	5.32	0.144	0.14327	0.50694	0.14513	0.78472
479	TRAINING	7	C2OHMIM	TfO OR TFMS	303.15	13.28	0.482375	0.48231	0.01866	0.48619	0.78566
480	TEST	7	C2OHMIM	TFSI or NTf2	333.15	9.479	0.273223	0.27242	0.28551	0.27105	0.78697
481	TRAINING	5	EMIM or C2MIm	PF6	333.15	1.449	0.038	0.03823	0.60526	0.0383	0.78947
482	TRAINING	9	C6MIm or HMIM	TFSI or NTf2	353.15	14.391	0.3868	0.38395	0.73681	0.38986	0.79111
483	TRAINING	7	C2OHMIM	TfO OR TFMS	303.15	4.028	0.189226	0.19394	2.50529	0.1877	0.79281
484	TRAINING	8	C6MIm or HMIM	PF6	313.15	9.44	0.383	0.38534	0.61097	0.38604	0.79373
485	TRAINING	15	DMEAH (N11H,CH2OH)	HCO2	303.2	0.124	0.0225	0.02188	2.75556	0.02232	0.8
486	TRAINING	5	EMIM or C2MIm	PF6	343.15	17.05	0.339	0.33877	0.06785	0.34175	0.81121
487	TRAINING	10	C8MIm	PF6	313.15	5.527	0.3189	0.31586	0.95328	0.31631	0.81217
488	TRAINING	7	C2OHMIM	TfO OR TFMS	353.15	1.561	0.0356899	0.03647	2.15686	0.03599	0.81232
489	TRAINING	7	C2OHMIM	TfO OR TFMS	313.15	6.719	0.252346	0.24777	1.79548	0.25435	0.81252
490	TRAINING	6	C2OHMIM	BF4	303.15	9.69	0.235	0.2385	1.48936	0.23691	0.81277
491	TRAINING	1	C4MIm or BMIM	PF6	313.15	6.74	0.29	0.28676	1.11724	0.28764	0.81379
492	TEST	15	DMEAH (N11H,CH2OH)	HCO2	323.2	0.162	0.0172	0.01628	5.34884	0.01734	0.81395
493	TRAINING	7	C2OHMIM	PF6	333.15	9.397	0.198818	0.19581	1.50402	0.19718	0.81489
494	TRAINING	5	EMIM or C2MIm	PF6	343.15	9.901	0.212	0.2072	2.26415	0.21373	0.81604
495	TEST	5	EMIM or C2MIm	TFSI or NTf2	333.15	16.86	0.496	0.49656	0.1129	0.50006	0.81855
496	TRAINING	13	EMIM or C2MIm	(C2F5)3PF3 or TPTP	333.15	2.103	0.0794131	0.07929	0.15497	0.07876	0.82237
497	TRAINING	15	MEDAH (CH2OH)2CH3NH	OAc or CH3COO	303.2	0.837	0.1238	0.12488	0.87237	0.12482	0.82391
498	TRAINING	13	EMIM or C2MIm	(C2F5)3PF3 or TPTP	303.15	4.025	0.238073	0.23385	1.77388	0.23611	0.82459
499	TRAINING	1	C4MIm or BMIM	BF4	343.15	5.79	0.161	0.16158	0.36025	0.16233	0.82609
500	TRAINING	1	C4MIm or BMIM	BF4	323.15	6.13	0.24	0.23928	0.3	0.23801	0.82917
501	TRAINING	10	C8MIm	PF6	303.15	3.268	0.2412	0.23642	1.98176	0.2392	0.82919
502	TRAINING	13	EMIM or C2MIm	(C2F5)3PF3 or TPTP	313.15	6.688	0.311562	0.31239	0.26575	0.30897	0.83194
503	TRAINING	9	C6MIm or HMIM	TFSI or NTf2	313.15	8.737	0.4325	0.43754	1.16532	0.4361	0.83237
504	TRAINING	2	C4MIm or BMIM	EtSO4	333.15	4.763	0.043	0.04445	3.37209	0.04336	0.83721
505	TRAINING	8	C6MIm or HMIM	TFSI or NTf2	343.15	10.4	0.322	0.32433	0.7236	0.3247	0.83851
506	TRAINING	6	C2OHMIM	BF4	313.15	7.6	0.162	0.16447	1.52469	0.16336	0.83951
507	TEST	8	C6MIm or HMIM	BF4	303.15	7.92	0.469	0.46438	0.98507	0.46506	0.84009
508	TRAINING	8	C6MIm or HMIM	PF6	323.15	10.9	0.37	0.37077	0.20811	0.36689	0.84054
509	TRAINING	7	C2OHMIM	TFSI or NTf2	323.15	12.52	0.383612	0.38397	0.09645	0.38683	0.84202
510	TEST	5	EMIM or C2MIm	PF6	338.15	7.107	0.166	0.15953	3.89759	0.1646	0.84337
511	TRAINING	12	C4MIm or BMIM	OAc or CH3COO	293.15	0.027	0.202533	0.20594	1.68198	0.20425	0.84755
512	TRAINING	7	C2OHMIM	TFSI or NTf2	303.15	4.902	0.233278	0.23399	0.29576	0.23528	0.84869
513	TEST	1	C4MIm or BMIM	BF4	323.15	8.13	0.303	0.29959	1.12541	0.30558	0.85149
514	TRAINING	5	EMIM or C2MIm	PF6	338.15	14.23	0.308	0.31363	1.82792	0.30537	0.8539
515	TRAINING	1	C4MIm or BMIM	TFSI or NTf2	303.15	2.46	0.174	0.17321	0.45402	0.17251	0.85632
516	TRAINING	10	C8MIm	PF6	343.15	9.912	0.341	0.33761	0.99413	0.33807	0.85924
517	TRAINING	1	C4MIm or BMIM	TFSI or NTf2	343.15	7.48	0.246	0.24503	0.39431	0.24388	0.86179
518	TRAINING	7	C2OHMIM	TFSI or NTf2	343.15	10.09	0.26075	0.25659	1.57652	0.26295	0.86306
519	TRAINING	15	DMEAH (N11H,CH2OH)	HCO2	303.2	0.409	0.0611	0.0602	1.473	0.06057	0.86743
520	TEST	8	C6MIm or HMIM	PF6	323.15	9.17	0.319	0.32137	0.74295	0.32178	0.87147
521	TRAINING	12	EMIM or C2MIm	CH3CH2CO2	333.15	2.312	0.340794	0.3352	1.64158	0.33782	0.87279
522	TRAINING	15	MEDAH (CH2OH)2CH3NH	HCO2	333.2	0.683	0.0263	0.02659	1.10266	0.02607	0.87452
523	TEST	7	C2OHMIM	TFSI or NTf2	313.15	5.235	0.216643	0.21141	2.39612	0.2147	0.87719
524	TEST	1	C4MIm or BMIM	PF6	303.15	7.37	0.358	0.36132	0.92737	0.36116	0.88268
525	TRAINING	15	MEDAH (CH2OH)2CH3NH	OAc or CH3COO	333.2	0.645	0.0405	0.04064	0.34568	0.04086	0.88889
526	TRAINING	6	C2OHMIM	BF4	303.15	8.02	0.208	0.20815	0.07212	0.20615	0.88942
527	TRAINING	8	C6MIm or HMIM	TFSI or NTf2	303.15	7.8	0.464	0.45768	1.36207	0.45987	0.89009
528	TRAINING	9	C6MIm or HMIM	TFSI or NTf2	323.15	15.317	0.5598	0.56336	0.63594	0.56481	0.89496
529	TEST	1	C4MIm or BMIM	BF4	313.15	6.44	0.28	0.27906	0.33571	0.27749	0.89643
530	TRAINING	12	C6MIm or HMIM	OAc or CH3COO	303.15	0.626	0.387371	0.38356	0.98389	0.38389	0.8987
531	TRAINING	5	EMIM or C2MIm	PF6	338.15	11.49	0.257	0.25509	0.74319	0.25469	0.89883
532	TRAINING	7	C2OHMIM	PF6	313.15	6.275	0.178766	0.17793	0.48658	0.18042	0.90604
533	TRAINING	10	C8MIm	PF6	303.15	4.885	0.3366	0.3319	1.39632	0.33353	0.91206
534	TRAINING	15	DMEAH (N11H,CH2OH)	OAc or CH3COO	313.2	1.111	0.1502	0.15088	0.45273	0.14883	0.91212
535	TRAINING	6	C2OHMIM	BF4	333.15	7.57	0.116	0.11541	0.50862	0.11706	0.91379
536	TEST	1	C4MIm or BMIM	PF6	313.15	7.93	0.334	0.32938	1.38323	0.33094	0.91617
537	TRAINING	8	C6MIm or HMIM	BF4	343.15	5.76	0.205	0.20291	1.01951	0.20688	0.91707
538	TRAINING	7	C2OHMIM	TFSI or NTf2	303.15	3.01	0.149037	0.14831	0.46309	0.14763	0.91946
539	TRAINING	6	C2OHMIM	BF4	343.15	9.89	0.127	0.12837	1.07874	0.12817	0.92126
540	TRAINING	15	DMEAH (N11H,CH2OH)	HCO2	313.2	0.415	0.0445	0.04466	0.35955	0.04409	0.92135
541	TRAINING	4	C4MIm or BMIM	PF6	298.15	5.59	0.317	0.31829	0.40694	0.31993	0.92429
542	TRAINING	13	EMIM or C2MIm	(C2F5)3PF3 or TPTP	333.15	12.994	0.398605	0.39382	1.20035	0.39492	0.92439
543	TRAINING	1	C4MIm or BMIM	BF4	313.15	4.85	0.22	0.22306	1.39091	0.22204	0.92727
544	TRAINING	15	MEDAH (CH2OH)2CH3NH	HCO2	313.2	1.162	0.0657	0.06629	0.89802	0.06509	0.92846
545	TRAINING	15	DMEAH (N11H,CH2OH)	OAc or CH3COO	333.2	1.052	0.0773	0.07738	0.10349	0.07802	0.93144
546	TRAINING	9	C8MIm	TFSI or NTf2	333.15	4.473	0.2339	0.24237	3.62121	0.23608	0.93202
547	TRAINING	5	EMIM or C2MIm	PF6	353.15	7.782	0.152	0.15567	2.41447	0.15343	0.94079
548	TRAINING	13	EMIM or C2MIm	(C2F5)3PF3 or TPTP	333.15	8.472	0.280601	0.28146	0.30616	0.28325	0.94407
549	TRAINING	1	C4MIm or BMIM	TFSI or NTf2	343.15	4.6	0.163	0.16455	0.95092	0.16454	0.94479
550	TRAINING	12	EMIM or C2MIm	L-lactate	323.15	2.52	0.333778	0.32832	1.63513	0.33062	0.94605
551	TRAINING	4	C4MIm or BMIM	PF6	403.15	6.3	0.076	0.07327	3.59211	0.07528	0.94737
552	TRAINING	8	C6MIm or HMIM	PF6	343.15	9.57	0.247	0.24679	0.08502	0.24934	0.94737
553	TRAINING	12	C4MIm or BMIM	OAc or CH3COO	303.15	2.196	0.484891	0.48136	0.7283	0.48029	0.94897
554	TRAINING	12	C4MIm or BMIM	OAc or CH3COO	323.15	3.186	0.458862	0.4631	0.92355	0.46323	0.95188
555	TRAINING	12	C6MIm or HMIM	OAc or CH3COO	323.15	0.787	0.352257	0.35503	0.78712	0.35562	0.95461
556	TRAINING	15	MEDAH (CH2OH)2CH3NH	OAc or CH3COO	303.2	0.292	0.0513	0.05126	0.07797	0.05081	0.95517
557	TRAINING	15	MEDAH (CH2OH)2CH3NH	OAc or CH3COO	303.2	1.076	0.1496	0.15056	0.64171	0.15103	0.95588
558	TRAINING	9	C8MIm	TFSI or NTf2	313.15	2.206	0.1599	0.16466	2.97686	0.16143	0.95685
559	TRAINING	12	EMIM or C2MIm	L-lactate	293.15	2.897	0.472037	0.46846	0.75775	0.46752	0.95689
560	TRAINING	8	C6MIm or HMIM	PF6	333.15	1.99	0.054	0.05568	3.11111	0.05348	0.96296
561	TRAINING	1	C4MIm or BMIM	PF6	303.15	5.15	0.26	0.26361	1.38846	0.26251	0.96538
562	TEST	12	EMIM or C2MIm	L-lactate	333.15	0.776	0.174272	0.1758	0.87663	0.17596	0.96844
563	TRAINING	5	EMIM or C2MIm	TFSI or NTf2	333.15	10.87	0.363	0.36482	0.50138	0.36652	0.9697
564	TRAINING	12	C4MIm or BMIM	OAc or CH3COO	313.15	2.145	0.451268	0.44834	0.64879	0.44687	0.97454
565	TRAINING	1	C4MIm or BMIM	BF4	313.15	3.46	0.166	0.16802	1.21687	0.16762	0.9759
566	TRAINING	2	C4MIm or BMIM	EtSO4	343.15	12.178	0.088	0.08878	0.88636	0.08714	0.97727
567	TRAINING	7	C2OHMIM	PF6	323.15	15.34	0.337114	0.34183	1.40314	0.3404	0.97894
568	TRAINING	1	C4MIm or BMIM	TFSI or NTf2	313.15	4.64	0.258	0.25576	0.86822	0.25546	0.9845
569	TRAINING	1	C4MIm or BMIM	TFSI or NTf2	323.15	7.51	0.34	0.34332	0.97647	0.34336	0.98824
570	TEST	8	C6MIm or HMIM	BF4	343.15	7.65	0.272	0.25185	7.40809	0.26931	0.98897
571	TRAINING	15	MEDAH (CH2OH)2CH3NH	OAc or CH3COO	323.2	0.996	0.0776	0.0783	0.90206	0.07837	0.99227
572	TRAINING	15	DMEAH (N11H,CH2OH)	OAc or CH3COO	313.2	0.751	0.1106	0.11178	1.06691	0.1117	0.99458
573	TEST	8	C6MIm or HMIM	PF6	303.15	8.09	0.396	0.39798	0.5	0.39997	1.00253
574	TRAINING	15	DMEAH (N11H,CH2OH)	OAc or CH3COO	303.2	0.238	0.0648	0.06421	0.91049	0.06415	1.00309
575	TRAINING	15	DMEAH (N11H,CH2OH)	OAc or CH3COO	303.2	0.19	0.0538	0.05348	0.5948	0.05326	1.00372
576	TRAINING	1	C4MIm or BMIM	BF4	333.15	8.36	0.269	0.26573	1.21561	0.2663	1.00372
577	TRAINING	15	MEDAH (CH2OH)2CH3NH	HCO2	313.2	0.514	0.0298	0.02992	0.40268	0.0295	1.00671
578	TRAINING	13	EMIM or C2MIm	(C2F5)3PF3 or TPTP	333.15	4.588	0.164888	0.16456	0.19881	0.16656	1.01414
579	TEST	9	C6MIm or HMIM	TFSI or NTf2	323.15	12.967	0.5036	0.51196	1.66005	0.50873	1.01867
580	TRAINING	8	C6MIm or HMIM	PF6	313.15	7.99	0.333	0.33483	0.54955	0.33641	1.02402
581	TRAINING	9	C6MIm or HMIM	TFSI or NTf2	343.15	13.339	0.4069	0.40475	0.52839	0.40271	1.02974
582	TRAINING	15	MEDAH (CH2OH)2CH3NH	OAc or CH3COO	323.2	0.649	0.0532	0.05254	1.2406	0.05265	1.03383
583	TEST	7	C2OHMIM	TFSI or NTf2	323.15	13.36	0.402221	0.40302	0.20388	0.40636	1.03431
584	TRAINING	10	C8MIm	PF6	313.15	3.65	0.2284	0.2246	1.66375	0.22603	1.03765
585	TRAINING	15	DMEAH (N11H,CH2OH)	HCO2	323.2	0.354	0.0308	0.02975	3.40909	0.03048	1.03896
586	TRAINING	1	C4MIm or BMIM	TFSI or NTf2	313.15	6.67	0.347	0.35176	1.37176	0.35063	1.04611
587	TRAINING	9	C6MIm or HMIM	TFSI or NTf2	353.15	7.668	0.2298	0.22905	0.32637	0.22739	1.04874
588	TRAINING	8	C6MIm or HMIM	PF6	323.15	7.61	0.271	0.27184	0.30996	0.27385	1.05166
589	TRAINING	7	C2OHMIM	TfO OR TFMS	323.15	7.383	0.232047	0.23031	0.72845	0.22956	1.05172
590	TRAINING	8	C6MIm or HMIM	PF6	313.15	10.7	0.428	0.42574	0.52804	0.42348	1.05607
591	TRAINING	13	EMIM or C2MIm	(C2F5)3PF3 or TPTP	323.15	5.526	0.23064	0.22877	0.81063	0.2282	1.05777
592	TEST	12	EMIM or C2MIm	L-lactate	323.15	2.832	0.350247	0.3439	1.81211	0.34654	1.05836
593	TRAINING	1	C4MIm or BMIM	TFSI or NTf2	303.15	4.78	0.307	0.31072	1.21173	0.31027	1.06515
594	TEST	13	EMIM or C2MIm	(C2F5)3PF3 or TPTP	313.15	7.546	0.337048	0.34401	2.06567	0.34064	1.06582
595	TEST	5	EMIM or C2MIm	PF6	333.15	13.69	0.318	0.32543	2.33648	0.31458	1.07547
596	TRAINING	15	DMEAH (N11H,CH2OH)	OAc or CH3COO	313.2	0.516	0.0818	0.08192	0.1467	0.08268	1.07579
597	TRAINING	7	C2OHMIM	TfO OR TFMS	343.15	5.678	0.137461	0.13827	0.56	0.13602	1.07636
598	TRAINING	9	C8MIm	TFSI or NTf2	303.15	3.456	0.2744	0.2768	0.87464	0.27736	1.07872
599	TRAINING	8	C6MIm or HMIM	BF4	313.15	3.85	0.226	0.22715	0.50885	0.22846	1.0885
600	TRAINING	12	C4MIm or BMIM	OAc or CH3COO	333.15	1.658	0.357867	0.36251	1.29752	0.36177	1.09074
601	TEST	15	DMEAH (N11H,CH2OH)	OAc or CH3COO	313.2	0.249	0.0455	0.04411	3.05495	0.045	1.0989
602	TRAINING	5	EMIM or C2MIm	TFSI or NTf2	323.15	15.23	0.523	0.52084	0.413	0.51724	1.10134
603	TRAINING	7	C2OHMIM	TfO OR TFMS	353.15	9.145	0.182452	0.18457	1.13425	0.18451	1.10137
604	TRAINING	12	C6MIm or HMIM	OAc or CH3COO	303.15	2.269	0.531951	0.5254	1.23152	0.52607	1.10557
605	TEST	6	C2OHMIM	BF4	303.15	7.03	0.187	0.18517	0.97861	0.18493	1.10695
606	TRAINING	12	EMIM or C2MIm	CH3CH2CO2	303.15	3.196	0.532727	0.53289	0.03057	0.52683	1.10697
607	TRAINING	9	C6MIm or HMIM	TFSI or NTf2	333.15	10.726	0.387	0.38053	1.67183	0.3827	1.11111
608	TRAINING	12	EMIM or C2MIm	L-lactate	323.15	1.807	0.292334	0.29493	0.88818	0.2956	1.11737
609	TRAINING	12	C4MIm or BMIM	OAc or CH3COO	323.15	0.729	0.30629	0.30311	1.0383	0.30285	1.12319
610	TEST	13	EMIM or C2MIm	(C2F5)3PF3 or TPTP	313.15	1.003	0.0530867	0.04999	5.83337	0.05249	1.12409
611	TRAINING	2	C4MIm or BMIM	EtSO4	303.15	4.041	0.058	0.06004	3.51724	0.05734	1.13793
612	TEST	9	C6MIm or HMIM	TFSI or NTf2	353.15	12.57	0.3469	0.34354	0.96858	0.35086	1.14154
613	TRAINING	7	C2OHMIM	PF6	313.15	4.648	0.13468	0.13418	0.38604	0.13624	1.14328
614	TRAINING	15	DMEAH (N11H,CH2OH)	OAc or CH3COO	333.2	0.629	0.0498	0.05029	0.98394	0.04923	1.14458
615	TRAINING	13	EMIM or C2MIm	(C2F5)3PF3 or TPTP	343.15	9.384	0.269405	0.26827	0.42129	0.26632	1.14511
616	TRAINING	1	C4MIm or BMIM	PF6	323.15	7.49	0.261	0.25728	1.42529	0.25801	1.14559
617	TRAINING	12	C4MIm or BMIM	OAc or CH3COO	323.15	0.016	0.122938	0.12326	0.26219	0.12152	1.15316
618	TRAINING	10	C8MIm	PF6	343.15	2.676	0.1138	0.11569	1.66081	0.11512	1.15993
619	TRAINING	1	C4MIm or BMIM	TFSI or NTf2	333.15	8.35	0.322	0.32424	0.69565	0.32574	1.16149
620	TRAINING	15	DMEAH (N11H,CH2OH)	HCO2	333.2	0.34	0.0198	0.01998	0.90909	0.01957	1.16162
621	TRAINING	2	C4MIm or BMIM	EtSO4	323.15	9.932	0.092	0.09156	0.47826	0.09307	1.16304
622	TEST	15	MEDAH (CH2OH)2CH3NH	OAc or CH3COO	303.2	0.962	0.1375	0.13878	0.93091	0.1391	1.16364
623	TRAINING	13	EMIM or C2MIm	(C2F5)3PF3 or TPTP	353.15	2.395	0.0663143	0.06672	0.61183	0.06554	1.16758
624	TRAINING	1	C4MIm or BMIM	TFSI or NTf2	323.15	8.88	0.403	0.40098	0.50124	0.39829	1.16873
625	TRAINING	9	C6MIm or HMIM	TFSI or NTf2	303.15	10.105	0.5517	0.55414	0.44227	0.55819	1.17636
626	TEST	13	EMIM or C2MIm	(C2F5)3PF3 or TPTP	333.15	5.185	0.18841	0.18389	2.39912	0.18619	1.17838
627	TRAINING	2	C4MIm or BMIM	EtSO4	303.15	7.698	0.101	0.09873	2.24752	0.1022	1.18812
628	TRAINING	5	EMIM or C2MIm	TFSI or NTf2	333.15	13.91	0.438	0.44088	0.65753	0.44321	1.1895
629	TEST	7	C2OHMIM	TfO OR TFMS	343.15	1.472	0.0385068	0.03506	8.93506	0.03804	1.19481
630	TRAINING	12	C6MIm or HMIM	OAc or CH3COO	333.15	1.725	0.40091	0.40731	1.59633	0.40572	1.19974
631	TRAINING	7	C2OHMIM	PF6	343.15	9.966	0.187481	0.1875	0	0.18975	1.2
632	TRAINING	15	DMEAH (N11H,CH2OH)	OAc or CH3COO	313.2	0.669	0.1008	0.10174	0.93254	0.10201	1.2004
633	TEST	1	C4MIm or BMIM	BF4	323.15	4.01	0.168	0.16453	2.06548	0.16598	1.20238
634	TRAINING	12	EMIM or C2MIm	L-lactate	313.15	2.479	0.365921	0.365	0.25182	0.3615	1.20831
635	TRAINING	12	EMIM or C2MIm	L-lactate	293.15	1.693	0.38799	0.39243	1.1444	0.3927	1.21399
636	TRAINING	12	EMIM or C2MIm	L-lactate	323.15	0.803	0.206293	0.20992	1.75795	0.2088	1.21503
637	TRAINING	12	EMIM or C2MIm	OAc or CH3COO	323.15	2.88	0.396131	0.39356	0.64912	0.3913	1.21964
638	TRAINING	6	C2OHMIM	BF4	313.15	6.41	0.14	0.13867	0.95	0.13829	1.22143
639	TRAINING	12	EMIM or C2MIm	OAc or CH3COO	293.15	2.892	0.495184	0.49583	0.13043	0.50124	1.22296
640	TEST	8	C6MIm or HMIM	PF6	323.15	1.78	0.058	0.0629	8.44828	0.05871	1.22414
641	TRAINING	9	C6MIm or HMIM	TFSI or NTf2	313.15	9.91	0.4757	0.48322	1.58083	0.48153	1.22556
642	TEST	15	DMEAH (N11H,CH2OH)	OAc or CH3COO	313.2	0.586	0.0906	0.09116	0.6181	0.09172	1.2362
643	TRAINING	1	C4MIm or BMIM	BF4	333.15	7.55	0.235	0.23993	2.09787	0.23791	1.2383
644	TRAINING	8	C6MIm or HMIM	PF6	303.15	4.62	0.244	0.24393	0.02869	0.24095	1.25
645	TRAINING	12	EMIM or C2MIm	L-lactate	333.15	1.457	0.230152	0.23318	1.31549	0.23305	1.25901
646	TRAINING	8	C6MIm or HMIM	TFSI or NTf2	303.15	6.12	0.371	0.376	1.34771	0.37568	1.26146
647	TRAINING	12	EMIM or C2MIm	L-lactate	293.15	2.584	0.453251	0.44853	1.04164	0.44751	1.26668
648	TEST	8	C6MIm or HMIM	PF6	343.15	5.08	0.133	0.13657	2.68421	0.13128	1.29323
649	TEST	15	DMEAH (N11H,CH2OH)	OAc or CH3COO	323.2	0.289	0.0332	0.03389	2.07831	0.03277	1.29518
650	TEST	7	C2OHMIM	TfO OR TFMS	313.15	15.09	0.442695	0.44579	0.69799	0.43695	1.29885
651	TRAINING	15	MEDAH (CH2OH)2CH3NH	OAc or CH3COO	303.2	0.585	0.0939	0.09356	0.36209	0.09268	1.29925
652	TRAINING	7	C2OHMIM	TfO OR TFMS	353.15	3.805	0.0837643	0.08197	2.18377	0.08271	1.30072
653	TEST	4	C4MIm or BMIM	PF6	313.15	10.2	0.401	0.40373	0.6808	0.40622	1.30175
654	TRAINING	12	C4MIm or BMIM	OAc or CH3COO	333.15	2.002	0.377904	0.37295	1.31088	0.37296	1.30824
655	TRAINING	6	C2OHMIM	BF4	323.15	9.31	0.164	0.16639	1.45732	0.16616	1.31707
656	TEST	12	EMIM or C2MIm	OAc or CH3COO	333.15	1.419	0.291311	0.29637	1.73646	0.29515	1.31767
657	TRAINING	12	C6MIm or HMIM	OAc or CH3COO	323.15	2.712	0.477367	0.46994	1.55575	0.47107	1.31903
658	TEST	5	EMIM or C2MIm	PF6	353.15	5.462	0.109	0.11508	5.57798	0.10756	1.3211
659	TEST	13	EMIM or C2MIm	(C2F5)3PF3 or TPTP	323.15	3.654	0.15895	0.15699	1.2331	0.15685	1.32118
660	TRAINING	12	C6MIm or HMIM	OAc or CH3COO	323.15	2.377	0.461966	0.45576	1.34348	0.45586	1.32184
661	TEST	9	C6MIm or HMIM	TFSI or NTf2	303.15	11.789	0.6078	0.61298	0.85225	0.61586	1.32609
662	TEST	7	C2OHMIM	TfO OR TFMS	323.15	10.26	0.29072	0.30077	3.46405	0.29456	1.32783
663	TEST	7	C2OHMIM	PF6	323.15	3.266	0.0851356	0.08748	2.79671	0.08623	1.32785
664	TRAINING	12	EMIM or C2MIm	CH3CH2CO2	313.15	2.307	0.434066	0.43139	0.61654	0.43983	1.32786
665	TRAINING	1	C4MIm or BMIM	TFSI or NTf2	313.15	5.47	0.291	0.29546	1.53265	0.2949	1.34021
666	TRAINING	13	EMIM or C2MIm	(C2F5)3PF3 or TPTP	333.15	0.683	0.0264244	0.02778	5.13017	0.02607	1.34112
667	TRAINING	15	MEDAH (CH2OH)2CH3NH	OAc or CH3COO	313.2	0.505	0.0521	0.0526	0.95969	0.0514	1.34357
668	TRAINING	12	EMIM or C2MIm	OAc or CH3COO	313.15	0.692	0.285711	0.28772	0.70317	0.28955	1.34368
669	TRAINING	5	EMIM or C2MIm	PF6	353.15	10.52	0.2	0.20079	0.395	0.2027	1.35
670	TRAINING	8	C6MIm or HMIM	PF6	333.15	4.58	0.141	0.13871	1.62411	0.13909	1.35461
671	TRAINING	15	MEDAH (CH2OH)2CH3NH	OAc or CH3COO	313.2	0.739	0.0729	0.07348	0.79561	0.07389	1.35802
672	TRAINING	12	EMIM or C2MIm	L-lactate	313.15	0.833	0.235456	0.23614	0.29052	0.23866	1.36078
673	TRAINING	15	DMEAH (N11H,CH2OH)	OAc or CH3COO	333.2	0.525	0.0424	0.0429	1.17925	0.04182	1.36792
674	TRAINING	1	C4MIm or BMIM	TFSI or NTf2	323.15	6.15	0.293	0.28794	1.72696	0.28897	1.37543
675	TRAINING	12	C6MIm or HMIM	OAc or CH3COO	313.15	3.043	0.538791	0.53322	1.0339	0.53133	1.38468
676	TEST	13	EMIM or C2MIm	(C2F5)3PF3 or TPTP	353.15	4.63	0.124721	0.12573	0.80872	0.12299	1.38818
677	TRAINING	8	C6MIm or HMIM	BF4	303.15	3.27	0.233	0.23777	2.04721	0.23624	1.39056
678	TRAINING	5	EMIM or C2MIm	TFSI or NTf2	343.15	1.483	0.052	0.05087	2.17308	0.05127	1.40385
679	TEST	15	DMEAH (N11H,CH2OH)	OAc or CH3COO	333.2	0.278	0.0249	0.02459	1.24498	0.02455	1.40562
680	TRAINING	13	EMIM or C2MIm	(C2F5)3PF3 or TPTP	333.15	0.801	0.0308848	0.03211	3.96686	0.03045	1.40794
681	TRAINING	12	EMIM or C2MIm	L-lactate	333.15	2.053	0.268492	0.2646	1.44975	0.2647	1.4125
682	TEST	12	C4MIm or BMIM	OAc or CH3COO	333.15	0.742	0.288279	0.29294	1.6168	0.29238	1.42254
683	TRAINING	15	DMEAH (N11H,CH2OH)	HCO2	333.2	0.453	0.0253	0.02508	0.86957	0.02566	1.42292
684	TRAINING	3	C4MIm or BMIM	MeSO4	298.1	2.51	0.27	0.27249	0.92222	0.27385	1.42593
685	TRAINING	13	EMIM or C2MIm	(C2F5)3PF3 or TPTP	313.15	0.582	0.0310937	0.02784	10.4643	0.03065	1.4271
686	TRAINING	7	C2OHMIM	TFSI or NTf2	353.15	6.979	0.172832	0.16979	1.7419	0.17527	1.4294
687	TEST	12	C6MIm or HMIM	OAc or CH3COO	333.15	2.096	0.422444	0.41854	0.92415	0.41639	1.4331
688	TRAINING	7	C2OHMIM	PF6	343.15	7.63	0.148513	0.15126	1.85859	0.15063	1.43434
689	TRAINING	7	C2OHMIM	TfO OR TFMS	313.15	12.61	0.399432	0.4017	0.57586	0.39366	1.43716
690	TRAINING	1	C4MIm or BMIM	PF6	303.15	3.93	0.206	0.2044	0.7767	0.20303	1.44175
691	TRAINING	1	C4MIm or BMIM	TFSI or NTf2	313.15	3.99	0.227	0.2238	1.40969	0.22372	1.44493
692	TRAINING	1	C4MIm or BMIM	TFSI or NTf2	323.15	3.13	0.157	0.15861	1.02548	0.15927	1.44586
693	TRAINING	8	C6MIm or HMIM	BF4	323.15	4.46	0.219	0.22068	0.76712	0.22217	1.44749
694	TRAINING	7	C2OHMIM	TfO OR TFMS	303.15	6.017	0.268804	0.26994	0.42411	0.2649	1.45089
695	TRAINING	8	C6MIm or HMIM	TFSI or NTf2	323.15	10.5	0.442	0.43765	0.98416	0.43556	1.45701
696	TEST	9	C8MIm	TFSI or NTf2	313.15	15.558	0.6673	0.67553	1.23333	0.67707	1.46411
697	TRAINING	6	C2OHMIM	BF4	313.15	1.21	0.028	0.02805	0.17857	0.02841	1.46429
698	TRAINING	1	C4MIm or BMIM	TFSI or NTf2	323.15	1.2	0.06	0.06216	3.6	0.06088	1.46667
699	TRAINING	2	C4MIm or BMIM	EtSO4	353.15	10.116	0.07	0.06991	0.12857	0.07103	1.47143
700	TRAINING	1	C4MIm or BMIM	BF4	323.15	2.57	0.11	0.11041	0.37273	0.11162	1.47273
701	TRAINING	5	EMIM or C2MIm	PF6	353.15	15.67	0.285	0.28221	0.97895	0.2808	1.47368
702	TRAINING	12	C6MIm or HMIM	OAc or CH3COO	303.15	2.569	0.54836	0.53871	1.7598	0.54026	1.47714
703	TRAINING	7	C2OHMIM	PF6	333.15	5.328	0.118279	0.12256	3.60101	0.12007	1.4962
704	TRAINING	12	EMIM or C2MIm	OAc or CH3COO	303.15	2.789	0.453535	0.44914	0.96909	0.44674	1.49827
705	TRAINING	15	DMEAH (N11H,CH2OH)	OAc or CH3COO	303.2	0.139	0.0407	0.04177	2.62899	0.04131	1.49877
706	TEST	15	DMEAH (N11H,CH2OH)	HCO2	313.2	0.177	0.022	0.02233	1.5	0.02167	1.5
707	TRAINING	15	DMEAH (N11H,CH2OH)	HCO2	313.2	0.276	0.0318	0.03189	0.28302	0.03132	1.50943
708	TRAINING	7	C2OHMIM	TFSI or NTf2	323.15	3.55	0.128806	0.129	0.15528	0.13075	1.51398
709	TRAINING	2	C4MIm or BMIM	EtSO4	313.15	8.202	0.091	0.09103	0.03297	0.09238	1.51648
710	TRAINING	1	C4MIm or BMIM	BF4	303.15	1.24	0.081	0.0813	0.37037	0.07977	1.51852
711	TEST	1	C4MIm or BMIM	TFSI or NTf2	313.15	3.38	0.196	0.19285	1.60714	0.19302	1.52041
712	TRAINING	13	EMIM or C2MIm	(C2F5)3PF3 or TPTP	353.15	2.587	0.0713777	0.07204	0.92789	0.07029	1.52386
713	TRAINING	8	C6MIm or HMIM	PF6	303.15	3.1	0.166	0.16508	0.55422	0.16347	1.5241
714	TRAINING	6	C2OHMIM	BF4	313.15	3.38	0.076	0.07597	0.03947	0.07484	1.52632
715	TRAINING	5	EMIM or C2MIm	TFSI or NTf2	343.15	8.214	0.258	0.25542	1	0.25406	1.52713
716	TRAINING	12	EMIM or C2MIm	OAc or CH3COO	293.15	0.856	0.350251	0.3506	0.09974	0.3556	1.52729
717	TRAINING	6	C2OHMIM	BF4	303.15	4.62	0.126	0.1261	0.07937	0.12793	1.53175
718	TRAINING	6	C2OHMIM	BF4	333.15	8.68	0.133	0.13047	1.90226	0.13096	1.53383
719	TEST	15	MEDAH (CH2OH)2CH3NH	OAc or CH3COO	303.2	0.382	0.0651	0.06495	0.23041	0.0641	1.5361
720	TEST	13	EMIM or C2MIm	(C2F5)3PF3 or TPTP	303.15	1.613	0.100011	0.1012	1.18881	0.10155	1.53877
721	TRAINING	12	EMIM or C2MIm	CH3CH2CO2	293.15	2.296	0.543802	0.53315	1.95888	0.53539	1.54697
722	TRAINING	12	C4MIm or BMIM	OAc or CH3COO	313.15	1.783	0.429676	0.43761	1.84661	0.43635	1.55336
723	TRAINING	13	EMIM or C2MIm	(C2F5)3PF3 or TPTP	323.15	1.162	0.0528872	0.05368	1.49899	0.05371	1.55572
724	TRAINING	7	C2OHMIM	PF6	323.15	8.788	0.212719	0.21138	0.62059	0.20939	1.55618
725	TRAINING	12	EMIM or C2MIm	L-lactate	313.15	2.831	0.385354	0.38374	0.41871	0.37933	1.56311
726	TRAINING	12	EMIM or C2MIm	CH3CH2CO2	293.15	1.639	0.499229	0.50718	1.59256	0.50707	1.57053
727	TRAINING	7	C2OHMIM	PF6	333.15	3.477	0.078945	0.08124	2.96578	0.08014	1.57161
728	TRAINING	2	C4MIm or BMIM	EtSO4	323.15	4.53	0.047	0.04775	1.59574	0.04774	1.57447
729	TRAINING	1	C4MIm or BMIM	TFSI or NTf2	303.15	4.06	0.273	0.26957	1.25641	0.26869	1.57875
730	TRAINING	1	C4MIm or BMIM	BF4	343.15	5.18	0.149	0.1463	1.81208	0.14664	1.58389
731	TRAINING	13	EMIM or C2MIm	(C2F5)3PF3 or TPTP	343.15	6.04	0.182506	0.18475	1.22952	0.1854	1.58567
732	TRAINING	7	C2OHMIM	TFSI or NTf2	333.15	3.793	0.121008	0.12332	1.91736	0.11908	1.58678
733	TEST	3	C4MIm or BMIM	MeSO4	298.1	5.008	0.424	0.41475	2.1816	0.43073	1.58726
734	TRAINING	15	DMEAH (N11H,CH2OH)	OAc or CH3COO	323.2	0.189	0.0233	0.02441	4.76395	0.02293	1.58798
735	TRAINING	13	EMIM or C2MIm	(C2F5)3PF3 or TPTP	303.15	1.645	0.101899	0.10309	1.16864	0.10352	1.59062
736	TEST	5	EMIM or C2MIm	TFSI or NTf2	333.15	2.773	0.108	0.10932	1.22222	0.10972	1.59259
737	TEST	4	C4MIm or BMIM	PF6	403.15	2.62	0.032	0.0302	5.625	0.03149	1.59375
738	TRAINING	8	C6MIm or HMIM	BF4	303.15	4.31	0.303	0.29864	1.43894	0.29817	1.59406
739	TRAINING	9	C8MIm	TFSI or NTf2	353.15	5.062	0.2176	0.21531	1.05239	0.22108	1.59926
740	TRAINING	1	C4MIm or BMIM	TFSI or NTf2	303.15	5.83	0.364	0.3694	1.48352	0.36989	1.61813
741	TRAINING	10	C8MIm	PF6	303.15	9.002	0.5087	0.51927	2.07785	0.51694	1.61982
742	TEST	13	EMIM or C2MIm	(C2F5)3PF3 or TPTP	333.15	1.218	0.0467107	0.04736	1.39013	0.04595	1.62845
743	TRAINING	15	MEDAH (CH2OH)2CH3NH	OAc or CH3COO	323.2	0.312	0.0275	0.02704	1.67273	0.02705	1.63636
744	TRAINING	5	EMIM or C2MIm	TFSI or NTf2	323.15	2.573	0.118	0.11692	0.91525	0.11606	1.64407
745	TRAINING	2	C4MIm or BMIM	EtSO4	333.15	2.999	0.031	0.02988	3.6129	0.03151	1.64516
746	TRAINING	1	C4MIm or BMIM	BF4	313.15	7.57	0.32	0.31332	2.0875	0.31472	1.65
747	TRAINING	8	C6MIm or HMIM	PF6	313.15	1.56	0.063	0.0646	2.53968	0.06404	1.65079
748	TRAINING	1	C4MIm or BMIM	PF6	323.15	9.93	0.333	0.32721	1.73874	0.3275	1.65165
749	TEST	5	EMIM or C2MIm	PF6	353.15	18.22	0.322	0.31105	3.40062	0.31664	1.6646
750	TRAINING	5	EMIM or C2MIm	PF6	333.15	4.83	0.124	0.12339	0.49194	0.12192	1.67742
751	TEST	1	C4MIm or BMIM	PF6	313.15	3.85	0.169	0.17221	1.89941	0.17184	1.68047
752	TRAINING	12	C4MIm or BMIM	OAc or CH3COO	303.15	1.165	0.414855	0.42225	1.78258	0.42185	1.68616
753	TRAINING	4	C4MIm or BMIM	PF6	313.15	3.35	0.153	0.1508	1.43791	0.15042	1.68627
754	TRAINING	1	C4MIm or BMIM	BF4	323.15	1.7	0.074	0.07526	1.7027	0.07525	1.68919
755	TRAINING	12	EMIM or C2MIm	OAc or CH3COO	323.15	2.515	0.380009	0.37538	1.21809	0.37358	1.69176
756	TRAINING	12	C6MIm or HMIM	OAc or CH3COO	293.15	1.792	0.525823	0.53633	1.99812	0.53472	1.69193
757	TEST	6	C2OHMIM	BF4	313.15	8.9	0.186	0.19072	2.53763	0.18916	1.69892
758	TRAINING	12	EMIM or C2MIm	L-lactate	303.15	3.19	0.448725	0.45344	1.05083	0.45636	1.70156
759	TRAINING	1	C4MIm or BMIM	PF6	313.15	4.53	0.197	0.20059	1.82234	0.20036	1.70558
760	TRAINING	13	EMIM or C2MIm	(C2F5)3PF3 or TPTP	353.15	5.32	0.143321	0.14278	0.37777	0.14086	1.71741
761	TRAINING	12	EMIM or C2MIm	L-lactate	293.15	1.063	0.324313	0.32829	1.22627	0.32989	1.71962
762	TRAINING	1	C4MIm or BMIM	BF4	323.15	5.62	0.225	0.22187	1.39111	0.22113	1.72
763	TRAINING	9	C6MIm or HMIM	TFSI or NTf2	343.15	11.665	0.3662	0.36001	1.69033	0.3599	1.72037
764	TEST	5	EMIM or C2MIm	TFSI or NTf2	313.15	2.365	0.126	0.12677	0.61111	0.12383	1.72222
765	TEST	9	C8MIm	TFSI or NTf2	303.15	2.007	0.1672	0.16962	1.44737	0.17009	1.72847
766	TRAINING	12	EMIM or C2MIm	CH3CH2CO2	293.15	2.604	0.5616	0.54956	2.14384	0.55187	1.73251
767	TEST	15	MEDAH (CH2OH)2CH3NH	OAc or CH3COO	313.2	1.396	0.1267	0.1276	0.71034	0.12449	1.74428
768	TRAINING	12	EMIM or C2MIm	CH3CH2CO2	323.15	0.426	0.298719	0.30328	1.52669	0.30394	1.74764
769	TRAINING	7	C2OHMIM	TFSI or NTf2	343.15	6.606	0.180836	0.18185	0.58075	0.18396	1.74779
770	TRAINING	12	C4MIm or BMIM	OAc or CH3COO	333.15	0.512	0.262793	0.25819	1.75164	0.2582	1.74784
771	TEST	12	EMIM or C2MIm	OAc or CH3COO	323.15	1.845	0.34467	0.35077	1.76979	0.35071	1.75238
772	TRAINING	12	C4MIm or BMIM	OAc or CH3COO	313.15	3.055	0.493478	0.48728	1.25607	0.48481	1.7566
773	TRAINING	5	EMIM or C2MIm	PF6	333.15	9.227	0.224	0.22691	1.29911	0.22794	1.75893
774	TEST	6	C2OHMIM	BF4	323.15	7.93	0.142	0.14378	1.25352	0.1445	1.76056
775	TRAINING	12	C4MIm or BMIM	OAc or CH3COO	293.15	2.244	0.527544	0.51958	1.50968	0.51825	1.76179
776	TRAINING	12	EMIM or C2MIm	L-lactate	313.15	1.824	0.322939	0.33044	2.32275	0.32864	1.76537
777	TRAINING	12	EMIM or C2MIm	OAc or CH3COO	293.15	2.201	0.456819	0.45349	0.72878	0.44875	1.76639
778	TRAINING	12	C4MIm or BMIM	OAc or CH3COO	293.15	2.6	0.547223	0.53838	1.61599	0.53754	1.76949
779	TRAINING	9	C6MIm or HMIM	TFSI or NTf2	353.15	4.942	0.1567	0.15719	0.3127	0.15392	1.77409
780	TRAINING	1	C4MIm or BMIM	TFSI or NTf2	323.15	2.24	0.114	0.11597	1.72807	0.11603	1.7807
781	TRAINING	12	EMIM or C2MIm	L-lactate	333.15	2.715	0.303098	0.29756	1.82702	0.2977	1.78083
782	TRAINING	13	EMIM or C2MIm	(C2F5)3PF3 or TPTP	343.15	5.137	0.15761	0.15974	1.35128	0.16043	1.78907
783	TEST	4	C4MIm or BMIM	PF6	298.15	1.28	0.086	0.08411	2.19767	0.08446	1.7907
784	TRAINING	7	C2OHMIM	PF6	303.15	1.336	0.0474324	0.04754	0.29536	0.04825	1.79325
785	TEST	1	C4MIm or BMIM	BF4	333.15	5.14	0.169	0.16431	2.77515	0.16595	1.80473
786	TRAINING	15	DMEAH (N11H,CH2OH)	OAc or CH3COO	333.2	0.417	0.0348	0.035	0.57471	0.03417	1.81034
787	TRAINING	2	C4MIm or BMIM	EtSO4	323.15	1.29	0.016	0.01575	1.5625	0.01571	1.8125
788	TRAINING	13	EMIM or C2MIm	(C2F5)3PF3 or TPTP	303.15	2.854	0.171201	0.17191	0.4141	0.17433	1.82764
789	TEST	15	MEDAH (CH2OH)2CH3NH	OAc or CH3COO	333.2	1.034	0.0616	0.06164	0.06494	0.06273	1.83442
790	TRAINING	7	C2OHMIM	TFSI or NTf2	353.15	10.68	0.247841	0.25141	1.45682	0.24325	1.83616
791	TRAINING	13	EMIM or C2MIm	(C2F5)3PF3 or TPTP	353.15	2.763	0.0761017	0.07688	1.02266	0.0747	1.84193
792	TRAINING	1	C4MIm or BMIM	BF4	313.15	1.46	0.076	0.07457	1.88158	0.0746	1.84211
793	TRAINING	8	C6MIm or HMIM	BF4	323.15	2.66	0.134	0.1369	2.16418	0.13647	1.84328
794	TEST	12	C4MIm or BMIM	OAc or CH3COO	323.15	2.064	0.405475	0.41116	1.40212	0.41297	1.84851
795	TRAINING	4	C4MIm or BMIM	PF6	343.15	8	0.213	0.20694	2.84507	0.20903	1.86385
796	TRAINING	12	EMIM or C2MIm	CH3CH2CO2	313.15	0.7	0.302146	0.30273	0.19336	0.2965	1.86856
797	TRAINING	7	C2OHMIM	TfO OR TFMS	343.15	3.58	0.0902109	0.08892	1.41907	0.08851	1.87361
798	TRAINING	4	C4MIm or BMIM	PF6	298.15	2.76	0.175	0.17121	2.16571	0.17172	1.87429
799	TRAINING	12	EMIM or C2MIm	L-lactate	333.15	1.082	0.201854	0.2057	1.90549	0.20566	1.88568
800	TRAINING	1	C4MIm or BMIM	PF6	303.15	8.26	0.405	0.39714	1.94074	0.39735	1.88889
801	TRAINING	12	EMIM or C2MIm	OAc or CH3COO	293.15	2.52	0.47591	0.4693	1.38898	0.46691	1.89118
802	TRAINING	12	EMIM or C2MIm	OAc or CH3COO	333.15	2.007	0.323854	0.31877	1.5699	0.31769	1.90339
803	TRAINING	12	C6MIm or HMIM	OAc or CH3COO	313.15	1.548	0.453178	0.46249	2.05492	0.46185	1.91369
804	TEST	12	C4MIm or BMIM	OAc or CH3COO	293.15	1.637	0.484207	0.49373	1.96679	0.49351	1.92135
805	TEST	9	C6MIm or HMIM	TFSI or NTf2	313.15	11.549	0.5277	0.54	2.33087	0.53786	1.92534
806	TRAINING	8	C6MIm or HMIM	BF4	333.15	3.03	0.129	0.12833	0.51938	0.12651	1.93023
807	TRAINING	12	C6MIm or HMIM	OAc or CH3COO	293.15	2.44	0.568009	0.55845	1.68283	0.55703	1.93283
808	TRAINING	7	C2OHMIM	TfO OR TFMS	313.15	9.305	0.316432	0.32209	1.79836	0.32256	1.9469
809	TEST	12	EMIM or C2MIm	OAc or CH3COO	303.15	2.113	0.417274	0.41474	0.60736	0.40915	1.94701
810	TRAINING	9	C8MIm	TFSI or NTf2	313.15	1.025	0.077	0.07651	0.63636	0.0755	1.94805
811	TRAINING	9	C6MIm or HMIM	TFSI or NTf2	313.15	13.568	0.584	0.59692	2.21233	0.5954	1.95205
812	TRAINING	12	C6MIm or HMIM	OAc or CH3COO	333.15	2.913	0.461507	0.45286	1.87374	0.45248	1.95608
813	TRAINING	13	EMIM or C2MIm	(C2F5)3PF3 or TPTP	353.15	8.073	0.204286	0.20664	1.15239	0.20832	1.97476
814	TEST	8	C6MIm or HMIM	BF4	333.15	6.77	0.28	0.26801	4.28214	0.27447	1.975
815	TRAINING	12	C6MIm or HMIM	OAc or CH3COO	293.15	0.899	0.442554	0.45047	1.78873	0.45132	1.98079
816	TEST	12	EMIM or C2MIm	OAc or CH3COO	303.15	0.586	0.290284	0.28004	3.52901	0.28453	1.98225
817	TRAINING	6	C2OHMIM	BF4	303.15	2.89	0.081	0.08275	2.16049	0.08261	1.98765
818	TRAINING	2	C4MIm or BMIM	EtSO4	313.15	10.126	0.107	0.10725	0.23364	0.10486	2
819	TEST	6	C2OHMIM	BF4	343.15	8.72	0.115	0.11456	0.38261	0.1173	2
820	TRAINING	1	C4MIm or BMIM	BF4	323.15	4.5	0.187	0.18229	2.51872	0.18322	2.02139
821	TRAINING	6	C2OHMIM	BF4	323.15	4.44	0.083	0.08244	0.6747	0.08132	2.0241
822	TRAINING	12	EMIM or C2MIm	L-lactate	333.15	3.216	0.325226	0.33295	2.37496	0.33181	2.02444
823	TEST	10	C8MIm	PF6	343.15	1.157	0.0516	0.04776	7.44186	0.05265	2.03488
824	TRAINING	1	C4MIm or BMIM	PF6	303.15	2.17	0.113	0.1116	1.23894	0.11069	2.04425
825	TRAINING	12	EMIM or C2MIm	L-lactate	293.15	1.377	0.35818	0.36449	1.76173	0.36551	2.0465
826	TEST	8	C6MIm or HMIM	BF4	313.15	5.09	0.295	0.28831	2.2678	0.28896	2.04746
827	TEST	12	C6MIm or HMIM	OAc or CH3COO	303.15	1.656	0.492493	0.50262	2.05621	0.50263	2.05824
828	TEST	15	MEDAH (CH2OH)2CH3NH	HCO2	323.2	0.979	0.0461	0.0458	0.65076	0.04705	2.06074
829	TRAINING	15	MEDAH (CH2OH)2CH3NH	HCO2	323.2	1.113	0.0521	0.05194	0.3071	0.05318	2.07294
830	TRAINING	8	C6MIm or HMIM	PF6	343.15	7.55	0.203	0.20336	0.17734	0.19878	2.07882
831	TRAINING	7	C2OHMIM	TfO OR TFMS	313.15	4.47	0.179301	0.17598	1.85165	0.18303	2.08031
832	TRAINING	12	EMIM or C2MIm	OAc or CH3COO	323.15	3.248	0.410728	0.42206	2.75894	0.41939	2.10887
833	TEST	2	C4MIm or BMIM	EtSO4	323.15	2.847	0.034	0.03061	9.97059	0.03472	2.11765
834	TEST	2	C4MIm or BMIM	EtSO4	303.15	5.992	0.083	0.08166	1.61446	0.08124	2.12048
835	TRAINING	4	C4MIm or BMIM	PF6	403.15	1.32	0.016	0.01692	5.75	0.01634	2.125
836	TRAINING	12	EMIM or C2MIm	L-lactate	323.15	1.493	0.270096	0.27587	2.13769	0.27584	2.12658
837	TRAINING	9	C8MIm	TFSI or NTf2	343.15	4.777	0.2279	0.22406	1.68495	0.22305	2.12813
838	TRAINING	12	C4MIm or BMIM	OAc or CH3COO	303.15	1.478	0.438501	0.4489	2.37156	0.44785	2.1321
839	TRAINING	8	C6MIm or HMIM	TFSI or NTf2	323.15	8.21	0.347	0.35513	2.34294	0.35443	2.14121
840	TRAINING	12	EMIM or C2MIm	CH3CH2CO2	303.15	1.655	0.444776	0.45432	2.14575	0.45432	2.14575
841	TRAINING	12	C6MIm or HMIM	OAc or CH3COO	293.15	3.236	0.609368	0.62092	1.89572	0.62248	2.15172
842	TRAINING	12	C4MIm or BMIM	OAc or CH3COO	293.15	0.523	0.364981	0.355	2.73463	0.35712	2.15378
843	TRAINING	12	C6MIm or HMIM	OAc or CH3COO	293.15	2.769	0.587179	0.57498	2.07759	0.57453	2.15423
844	TRAINING	9	C8MIm	TFSI or NTf2	343.15	1.27	0.0662	0.06411	3.1571	0.06763	2.16012
845	TRAINING	15	MEDAH (CH2OH)2CH3NH	HCO2	323.2	0.56	0.0281	0.02841	1.1032	0.02749	2.17082
846	TRAINING	1	C4MIm or BMIM	BF4	323.15	7.57	0.28	0.28453	1.61786	0.2861	2.17857
847	TRAINING	1	C4MIm or BMIM	TFSI or NTf2	303.15	3.5	0.241	0.23675	1.76349	0.23573	2.18672
848	TRAINING	15	MEDAH (CH2OH)2CH3NH	OAc or CH3COO	303.2	0.473	0.0789	0.07816	0.9379	0.07717	2.19265
849	TRAINING	8	C6MIm or HMIM	BF4	323.15	5.91	0.288	0.28092	2.45833	0.28168	2.19444
850	TRAINING	12	EMIM or C2MIm	OAc or CH3COO	293.15	1.416	0.403004	0.41186	2.19752	0.41189	2.20496
851	TRAINING	12	EMIM or C2MIm	OAc or CH3COO	303.15	1.476	0.374597	0.38417	2.55555	0.38286	2.20584
852	TRAINING	6	C2OHMIM	BF4	313.15	5.05	0.112	0.10979	1.97321	0.10951	2.22321
853	TRAINING	12	C6MIm or HMIM	OAc or CH3COO	293.15	0.636	0.406861	0.39635	2.58345	0.39778	2.23198
854	TRAINING	12	C6MIm or HMIM	OAc or CH3COO	303.15	0.847	0.416032	0.42489	2.12906	0.42537	2.24443
855	TRAINING	7	C2OHMIM	TFSI or NTf2	333.15	6.224	0.190825	0.19264	0.96436	0.18648	2.26415
856	TEST	12	C4MIm or BMIM	OAc or CH3COO	303.15	2.578	0.509344	0.49789	2.24885	0.49779	2.26848
857	TRAINING	15	DMEAH (N11H,CH2OH)	OAc or CH3COO	313.2	0.176	0.0346	0.0331	4.33526	0.03381	2.28324
858	TRAINING	12	C4MIm or BMIM	OAc or CH3COO	333.15	3.013	0.426498	0.41602	2.45677	0.41676	2.28326
859	TEST	12	EMIM or C2MIm	L-lactate	333.15	2.38	0.286775	0.27997	2.37291	0.28021	2.28922
860	TRAINING	15	MEDAH (CH2OH)2CH3NH	OAc or CH3COO	333.2	1.182	0.0696	0.06912	0.68966	0.068	2.29885
861	TRAINING	1	C4MIm or BMIM	PF6	313.15	2.37	0.11	0.1075	2.27273	0.10746	2.30909
862	TRAINING	12	EMIM or C2MIm	CH3CH2CO2	293.15	1.059	0.447208	0.45933	2.71065	0.45758	2.31934
863	TRAINING	12	EMIM or C2MIm	OAc or CH3COO	303.15	0.868	0.32159	0.32533	1.16298	0.32908	2.32906
864	TRAINING	9	C8MIm	TFSI or NTf2	333.15	1.191	0.0676	0.07096	4.97041	0.06918	2.33728
865	TRAINING	15	MEDAH (CH2OH)2CH3NH	HCO2	303.2	0.969	0.0735	0.07363	0.17687	0.07178	2.34014
866	TRAINING	12	EMIM or C2MIm	OAc or CH3COO	313.15	2.187	0.392447	0.38435	2.06321	0.38325	2.3435
867	TRAINING	1	C4MIm or BMIM	TFSI or NTf2	343.15	1.46	0.051	0.04871	4.4902	0.0498	2.35294
868	TEST	12	C6MIm or HMIM	OAc or CH3COO	323.15	1.7	0.42485	0.43534	2.46919	0.43491	2.36798
869	TEST	1	C4MIm or BMIM	BF4	343.15	2.22	0.066	0.07083	7.31818	0.06757	2.37879
870	TRAINING	15	MEDAH (CH2OH)2CH3NH	HCO2	303.2	0.697	0.0559	0.05578	0.21467	0.05723	2.37925
871	TRAINING	15	DMEAH (N11H,CH2OH)	HCO2	303.2	0.333	0.0525	0.05067	3.48571	0.05125	2.38095
872	TEST	1	C4MIm or BMIM	TFSI or NTf2	313.15	8.25	0.434	0.42668	1.68664	0.42363	2.3894
873	TRAINING	12	C4MIm or BMIM	OAc or CH3COO	293.15	0.81	0.40414	0.41154	1.83097	0.41384	2.40008
874	TRAINING	9	C6MIm or HMIM	TFSI or NTf2	353.15	2.271	0.0761	0.07477	1.7477	0.07793	2.40473
875	TRAINING	1	C4MIm or BMIM	PF6	313.15	5.14	0.22	0.2253	2.40909	0.22531	2.41364
876	TRAINING	12	C4MIm or BMIM	OAc or CH3COO	323.15	0.919	0.3245	0.33241	2.43773	0.33234	2.41616
877	TEST	9	C8MIm	TFSI or NTf2	343.15	7.175	0.3185	0.31202	2.03454	0.3108	2.41758
878	TRAINING	12	EMIM or C2MIm	OAc or CH3COO	333.15	0.828	0.248141	0.25436	2.5061	0.25419	2.43759
879	TRAINING	10	C8MIm	PF6	353.15	1.239	0.0463	0.04509	2.61339	0.04517	2.4406
880	TRAINING	13	EMIM or C2MIm	(C2F5)3PF3 or TPTP	343.15	1.383	0.0449891	0.04268	5.13253	0.04389	2.44299
881	TEST	1	C4MIm or BMIM	TFSI or NTf2	303.15	2.97	0.209	0.20484	1.99043	0.20389	2.44498
882	TRAINING	1	C4MIm or BMIM	BF4	313.15	3.87	0.18	0.18489	2.71667	0.18441	2.45
883	TRAINING	6	C2OHMIM	BF4	323.15	2.5	0.047	0.04853	3.25532	0.04816	2.46809
884	TRAINING	7	C2OHMIM	PF6	353.15	1.828	0.0346719	0.03784	9.04899	0.03556	2.47839
885	TRAINING	12	C4MIm or BMIM	OAc or CH3COO	313.15	0.017	0.15412	0.14885	3.41948	0.15029	2.48515
886	TEST	12	EMIM or C2MIm	CH3CH2CO2	293.15	1.341	0.475062	0.48805	2.73396	0.48689	2.48978
887	TRAINING	15	DMEAH (N11H,CH2OH)	OAc or CH3COO	323.2	0.066	0.0104	0.01253	20.4808	0.01066	2.5
888	TEST	12	C6MIm or HMIM	OAc or CH3COO	313.15	0.853	0.390161	0.39798	2.00392	0.39992	2.50115
889	TRAINING	15	MEDAH (CH2OH)2CH3NH	HCO2	303.2	0.34	0.0302	0.03033	0.43046	0.03096	2.51656
890	TRAINING	12	C6MIm or HMIM	OAc or CH3COO	333.15	3.267	0.476252	0.48683	2.22119	0.48829	2.52775
891	TRAINING	12	EMIM or C2MIm	L-lactate	303.15	0.845	0.275391	0.26949	2.14294	0.26843	2.52785
892	TRAINING	1	C4MIm or BMIM	BF4	343.15	3.32	0.097	0.10226	5.42268	0.09946	2.53608
893	TRAINING	15	MEDAH (CH2OH)2CH3NH	OAc or CH3COO	333.2	0.773	0.0477	0.04777	0.14675	0.04891	2.53669
894	TRAINING	15	DMEAH (N11H,CH2OH)	HCO2	333.2	0.567	0.0307	0.03031	1.27036	0.03149	2.57329
895	TRAINING	2	C4MIm or BMIM	EtSO4	353.15	1.499	0.012	0.01185	1.25	0.01169	2.58333
896	TRAINING	12	EMIM or C2MIm	OAc or CH3COO	333.15	2.268	0.335554	0.32737	2.43894	0.32687	2.58794
897	TEST	12	EMIM or C2MIm	L-lactate	313.15	0.169	0.120465	0.11144	7.49165	0.11734	2.59395
898	TRAINING	12	EMIM or C2MIm	L-lactate	323.15	0.53	0.173589	0.17054	1.75649	0.16908	2.59755
899	TEST	1	C4MIm or BMIM	PF6	303.15	3.33	0.177	0.17376	1.83051	0.1724	2.59887
900	TRAINING	12	EMIM or C2MIm	CH3CH2CO2	313.15	2.048	0.419292	0.42365	1.03931	0.4302	2.60147
901	TRAINING	12	EMIM or C2MIm	CH3CH2CO2	313.15	3.224	0.482124	0.50307	4.34449	0.49472	2.61257
902	TRAINING	1	C4MIm or BMIM	BF4	303.15	4.11	0.228	0.21954	3.71053	0.22204	2.61404
903	TRAINING	1	C4MIm or BMIM	BF4	333.15	2.94	0.105	0.10051	4.27619	0.10225	2.61905
904	TEST	8	C6MIm or HMIM	TFSI or NTf2	313.15	7.16	0.359	0.36967	2.97214	0.36843	2.62674
905	TRAINING	12	EMIM or C2MIm	OAc or CH3COO	303.15	2.461	0.43596	0.42976	1.42213	0.42447	2.63554
906	TRAINING	7	C2OHMIM	TfO OR TFMS	333.15	3.342	0.0997124	0.10063	0.9328	0.10235	2.65797
907	TRAINING	12	EMIM or C2MIm	OAc or CH3COO	293.15	1.141	0.379682	0.38698	1.92226	0.38986	2.68079
908	TRAINING	12	C6MIm or HMIM	OAc or CH3COO	313.15	3.309	0.550611	0.56709	2.9929	0.56539	2.68416
909	TRAINING	12	EMIM or C2MIm	CH3CH2CO2	313.15	0.915	0.326563	0.34148	4.56791	0.33533	2.68466
910	TRAINING	8	C6MIm or HMIM	BF4	343.15	3.42	0.124	0.12944	4.3871	0.12067	2.68548
911	TRAINING	12	C4MIm or BMIM	OAc or CH3COO	303.15	3.202	0.539955	0.55224	2.27524	0.55446	2.68638
912	TEST	9	C8MIm	TFSI or NTf2	353.15	16.869	0.5181	0.47078	9.13337	0.50418	2.68674
913	TRAINING	12	EMIM or C2MIm	OAc or CH3COO	333.15	1.16	0.273253	0.28146	3.0036	0.28063	2.69985
914	TRAINING	12	EMIM or C2MIm	CH3CH2CO2	303.15	0.38	0.302146	0.29543	2.22269	0.29395	2.71252
915	TRAINING	8	C6MIm or HMIM	PF6	343.15	2.2	0.05	0.04768	4.64	0.05136	2.72
916	TEST	12	EMIM or C2MIm	L-lactate	323.15	1.178	0.243562	0.25079	2.9675	0.25019	2.72116
917	TRAINING	15	MEDAH (CH2OH)2CH3NH	OAc or CH3COO	333.2	0.904	0.0549	0.05484	0.10929	0.05642	2.76867
918	TRAINING	15	MEDAH (CH2OH)2CH3NH	HCO2	313.2	0.91	0.0505	0.05145	1.88119	0.0519	2.77228
919	TRAINING	6	C2OHMIM	BF4	343.15	6.13	0.082	0.08193	0.08537	0.08428	2.78049
920	TRAINING	1	C4MIm or BMIM	TFSI or NTf2	343.15	2.7	0.098	0.10008	2.12245	0.10073	2.78571
921	TEST	12	EMIM or C2MIm	L-lactate	313.15	1.503	0.299186	0.30818	3.00623	0.30753	2.78898
922	TRAINING	5	EMIM or C2MIm	PF6	338.15	5.001	0.119	0.11616	2.38655	0.11568	2.78992
923	TRAINING	12	EMIM or C2MIm	OAc or CH3COO	333.15	2.615	0.351899	0.34139	2.98643	0.34205	2.79887
924	TRAINING	12	EMIM or C2MIm	CH3CH2CO2	323.15	0.511	0.338222	0.32986	2.47247	0.32875	2.80065
925	TRAINING	12	C6MIm or HMIM	OAc or CH3COO	313.15	0.504	0.345542	0.33322	3.56591	0.33582	2.81347
926	TRAINING	5	EMIM or C2MIm	PF6	343.15	3.169	0.072	0.07839	8.875	0.07403	2.81944
927	TEST	7	C2OHMIM	TfO OR TFMS	343.15	16.45	0.316044	0.31153	1.41456	0.30708	2.82278
928	TEST	7	C2OHMIM	TfO OR TFMS	313.15	2.826	0.118347	0.11906	0.64243	0.12164	2.82333
929	TRAINING	12	C4MIm or BMIM	OAc or CH3COO	333.15	1.315	0.335534	0.34624	3.19069	0.34514	2.86286
930	TRAINING	12	C6MIm or HMIM	OAc or CH3COO	333.15	1.018	0.350448	0.35969	2.63714	0.3605	2.86828
931	TRAINING	6	C2OHMIM	BF4	343.15	10.66	0.137	0.13637	0.45985	0.13303	2.89781
932	TRAINING	15	DMEAH (N11H,CH2OH)	HCO2	333.2	1.042	0.052	0.05129	1.36538	0.05049	2.90385
933	TRAINING	15	MEDAH (CH2OH)2CH3NH	HCO2	313.2	0.264	0.0165	0.01627	1.39394	0.01602	2.90909
934	TRAINING	8	C6MIm or HMIM	PF6	313.15	3.54	0.159	0.15452	2.81761	0.15437	2.91195
935	TEST	6	C2OHMIM	BF4	313.15	2.35	0.055	0.05466	0.61818	0.05339	2.92727
936	TRAINING	6	C2OHMIM	BF4	353.15	10.47	0.126	0.12575	0.19841	0.12971	2.94444
937	TRAINING	12	C6MIm or HMIM	OAc or CH3COO	333.15	0.032	0.160373	0.15612	2.65219	0.15564	2.9515
938	TRAINING	1	C4MIm or BMIM	BF4	303.15	2.93	0.163	0.16845	3.34356	0.16782	2.95706
939	TRAINING	5	EMIM or C2MIm	TFSI or NTf2	353.15	3.141	0.095	0.09593	0.97895	0.09782	2.96842
940	TRAINING	12	EMIM or C2MIm	L-lactate	313.15	1.129	0.266343	0.27324	2.58945	0.27425	2.96866
941	TRAINING	1	C4MIm or BMIM	BF4	323.15	0.838	0.035	0.03717	6.2	0.03604	2.97143
942	TRAINING	12	EMIM or C2MIm	OAc or CH3COO	303.15	1.14	0.348521	0.35714	2.47288	0.35893	2.98648
943	TRAINING	12	EMIM or C2MIm	OAc or CH3COO	333.15	3.229	0.376191	0.38471	2.26462	0.38746	2.99563
944	TRAINING	12	EMIM or C2MIm	L-lactate	333.15	0.296	0.114225	0.11029	3.44475	0.11078	3.01577
945	TRAINING	3	C4MIm or BMIM	MeSO4	298.1	0.753	0.108	0.10597	1.87963	0.10474	3.01852
946	TRAINING	12	C4MIm or BMIM	OAc or CH3COO	313.15	2.544	0.472225	0.45954	2.68625	0.45795	3.02296
947	TRAINING	12	EMIM or C2MIm	OAc or CH3COO	323.15	1.554	0.327953	0.33706	2.77679	0.33806	3.08172
948	TRAINING	7	C2OHMIM	PF6	323.15	1.55	0.0412197	0.04208	2.13592	0.04247	3.08252
949	TRAINING	12	C4MIm or BMIM	OAc or CH3COO	333.15	3.415	0.442473	0.45838	3.59505	0.45616	3.09332
950	TRAINING	12	C6MIm or HMIM	OAc or CH3COO	333.15	2.465	0.441356	0.42955	2.6749	0.42767	3.10086
951	TRAINING	12	C6MIm or HMIM	OAc or CH3COO	313.15	2.285	0.50075	0.48743	2.66008	0.48519	3.10741
952	TRAINING	8	C6MIm or HMIM	BF4	313.15	1.27	0.07	0.0687	1.85714	0.06782	3.11429
953	TRAINING	12	EMIM or C2MIm	OAc or CH3COO	313.15	1.558	0.354392	0.36518	3.04412	0.36544	3.11749
954	TEST	12	C6MIm or HMIM	OAc or CH3COO	323.15	3.197	0.497857	0.51031	2.50135	0.51341	3.12401
955	TEST	15	DMEAH (N11H,CH2OH)	HCO2	333.2	0.681	0.0358	0.03554	0.72626	0.03692	3.12849
956	TRAINING	15	MEDAH (CH2OH)2CH3NH	OAc or CH3COO	323.2	0.452	0.0386	0.03771	2.3057	0.03739	3.13472
957	TRAINING	12	C4MIm or BMIM	OAc or CH3COO	333.15	1.014	0.312531	0.32335	3.46187	0.32236	3.1451
958	TRAINING	12	EMIM or C2MIm	CH3CH2CO2	293.15	3.167	0.589672	0.61052	3.53561	0.60839	3.17439
959	TRAINING	12	EMIM or C2MIm	L-lactate	313.15	0.358	0.163904	0.15368	6.23782	0.1587	3.17505
960	TEST	9	C8MIm	TFSI or NTf2	333.15	2.576	0.1413	0.15101	6.8719	0.14584	3.21302
961	TRAINING	8	C6MIm or HMIM	BF4	343.15	1.87	0.06	0.05689	5.18333	0.06193	3.21667
962	TRAINING	2	C4MIm or BMIM	EtSO4	343.15	7.389	0.058	0.05733	1.15517	0.05613	3.22414
963	TRAINING	12	C6MIm or HMIM	OAc or CH3COO	333.15	1.329	0.374626	0.38707	3.32177	0.38676	3.23902
964	TEST	12	C4MIm or BMIM	OAc or CH3COO	333.15	2.345	0.396006	0.38233	3.4535	0.38317	3.24139
965	TRAINING	1	C4MIm or BMIM	BF4	333.15	0.968	0.033	0.03587	8.69697	0.03407	3.24242
966	TRAINING	2	C4MIm or BMIM	EtSO4	333.15	7.067	0.062	0.06252	0.83871	0.05998	3.25806
967	TRAINING	15	DMEAH (N11H,CH2OH)	HCO2	333.2	0.799	0.0407	0.04087	0.41769	0.04203	3.26781
968	TRAINING	12	C6MIm or HMIM	OAc or CH3COO	303.15	1.374	0.47016	0.48548	3.25851	0.48563	3.29041
969	TRAINING	12	C4MIm or BMIM	OAc or CH3COO	293.15	1.354	0.461059	0.47553	3.13856	0.47632	3.30991
970	TRAINING	12	C6MIm or HMIM	OAc or CH3COO	303.15	1.095	0.444795	0.45915	3.22727	0.45952	3.31045
971	TRAINING	10	C8MIm	PF6	333.15	2.515	0.1185	0.12042	1.62025	0.12243	3.31646
972	TEST	12	C6MIm or HMIM	OAc or CH3COO	293.15	1.489	0.501764	0.51954	3.54278	0.51858	3.35145
973	TRAINING	12	C6MIm or HMIM	OAc or CH3COO	313.15	1.181	0.423499	0.43694	3.17381	0.4377	3.35326
974	TRAINING	15	MEDAH (CH2OH)2CH3NH	HCO2	313.2	0.391	0.0235	0.02328	0.93617	0.02271	3.3617
975	TRAINING	1	C4MIm or BMIM	BF4	343.15	1.12	0.03	0.02745	8.5	0.02899	3.36667
976	TRAINING	15	MEDAH (CH2OH)2CH3NH	OAc or CH3COO	333.2	0.129	0.0095	0.0096	1.05263	0.00918	3.36842
977	TRAINING	12	EMIM or C2MIm	OAc or CH3COO	323.15	1.053	0.291824	0.29903	2.46929	0.30166	3.37051
978	TRAINING	1	C4MIm or BMIM	PF6	303.15	2.77	0.148	0.14423	2.5473	0.14301	3.37162
979	TRAINING	12	C6MIm or HMIM	OAc or CH3COO	323.15	0.557	0.324636	0.31327	3.50107	0.31368	3.37478
980	TEST	12	EMIM or C2MIm	CH3CH2CO2	303.15	2.357	0.490055	0.46889	4.31891	0.4735	3.37819
981	TRAINING	9	C8MIm	TFSI or NTf2	353.15	1.343	0.063	0.06476	2.79365	0.06086	3.39683
982	TEST	8	C6MIm or HMIM	PF6	303.15	2.22	0.113	0.11619	2.82301	0.11684	3.39823
983	TRAINING	12	EMIM or C2MIm	CH3CH2CO2	303.15	2.942	0.520169	0.50208	3.47757	0.50242	3.41221
984	TRAINING	15	DMEAH (N11H,CH2OH)	OAc or CH3COO	313.2	0.088	0.0205	0.01945	5.12195	0.0198	3.41463
985	TRAINING	5	EMIM or C2MIm	TFSI or NTf2	323.15	1.29	0.059	0.05949	0.83051	0.06103	3.44068
986	TRAINING	2	C4MIm or BMIM	EtSO4	333.15	9.156	0.077	0.07623	1	0.07965	3.44156
987	TRAINING	12	C4MIm or BMIM	OAc or CH3COO	313.15	1.066	0.374199	0.38712	3.45297	0.38721	3.47702
988	TEST	1	C4MIm or BMIM	TFSI or NTf2	343.15	3.78	0.134	0.13847	3.33582	0.13867	3.48507
989	TRAINING	12	C6MIm or HMIM	OAc or CH3COO	323.15	1.027	0.374803	0.38747	3.37971	0.38789	3.49177
990	TRAINING	12	EMIM or C2MIm	L-lactate	333.15	0.131	0.0791074	0.08135	2.83488	0.08187	3.49221
991	TRAINING	6	C2OHMIM	BF4	343.15	4.08	0.055	0.05525	0.45455	0.05307	3.50909
992	TRAINING	12	C4MIm or BMIM	OAc or CH3COO	293.15	1.053	0.432627	0.44603	3.09813	0.44783	3.51419
993	TEST	12	EMIM or C2MIm	CH3CH2CO2	303.15	0.729	0.355663	0.37228	4.6721	0.36817	3.51651
994	TRAINING	15	DMEAH (N11H,CH2OH)	OAc or CH3COO	313.2	0.031	0.0108	0.01039	3.7963	0.01042	3.51852
995	TRAINING	5	EMIM or C2MIm	PF6	363.15	1.725	0.032	0.03178	0.6875	0.03313	3.53125
996	TRAINING	2	C4MIm or BMIM	EtSO4	303.15	2.526	0.041	0.04022	1.90244	0.03955	3.53659
997	TRAINING	15	MEDAH (CH2OH)2CH3NH	HCO2	303.2	0.551	0.0458	0.04577	0.0655	0.04742	3.53712
998	TRAINING	12	C6MIm or HMIM	OAc or CH3COO	323.15	1.353	0.402692	0.417	3.55315	0.41696	3.54321
999	TRAINING	12	EMIM or C2MIm	L-lactate	293.15	0.514	0.246984	0.2369	4.08288	0.23822	3.54843
1000	TEST	15	MEDAH (CH2OH)2CH3NH	HCO2	303.2	0.458	0.0391	0.03913	0.07673	0.04049	3.55499
1001	TEST	7	C2OHMIM	TFSI or NTf2	353.15	16.34	0.347924	0.33151	4.71112	0.36031	3.56712
1002	TEST	15	MEDAH (CH2OH)2CH3NH	HCO2	313.2	0.644	0.0356	0.0369	3.65169	0.03687	3.56742
1003	TRAINING	7	C2OHMIM	TfO OR TFMS	313.15	1.171	0.0511065	0.05664	10.8415	0.04927	3.58121
1004	TRAINING	1	C4MIm or BMIM	TFSI or NTf2	333.15	2.43	0.107	0.10623	0.71963	0.10316	3.58879
1005	TEST	10	C8MIm	PF6	313.15	0.944	0.0623	0.0622	0.16051	0.06006	3.59551
1006	TRAINING	1	C4MIm or BMIM	PF6	333.15	3.38	0.093	0.09699	4.29032	0.09639	3.64516
1007	TEST	12	C4MIm or BMIM	OAc or CH3COO	313.15	1.412	0.402941	0.4186	3.88611	0.41789	3.70991
1008	TRAINING	1	C4MIm or BMIM	PF6	323.15	1.23	0.047	0.04767	1.42553	0.04875	3.7234
1009	TRAINING	12	C6MIm or HMIM	OAc or CH3COO	293.15	1.187	0.47407	0.49178	3.7358	0.49174	3.72736
1010	TRAINING	12	C4MIm or BMIM	OAc or CH3COO	333.15	2.68	0.411784	0.39515	4.03952	0.39643	3.72868
1011	TEST	12	C6MIm or HMIM	OAc or CH3COO	313.15	2.661	0.52068	0.50327	3.34367	0.50105	3.77003
1012	TRAINING	7	C2OHMIM	TfO OR TFMS	303.15	1.059	0.0533394	0.04706	11.7073	0.05531	3.77111
1013	TRAINING	1	C4MIm or BMIM	PF6	333.15	10.11	0.285	0.27628	3.05965	0.27425	3.77193
1014	TRAINING	6	C2OHMIM	BF4	353.15	6.44	0.079	0.07759	1.78481	0.076	3.79747
1015	TEST	10	C8MIm	PF6	323.15	2.344	0.126	0.13307	5.61111	0.13079	3.80159
1016	TRAINING	12	C4MIm or BMIM	OAc or CH3COO	313.15	0.575	0.321318	0.30779	4.21026	0.3091	3.80257
1017	TEST	12	C6MIm or HMIM	OAc or CH3COO	303.15	3.184	0.577145	0.59512	3.11451	0.5991	3.80411
1018	TRAINING	7	C2OHMIM	TFSI or NTf2	343.15	2.078	0.061181	0.0622	1.63399	0.05887	3.80719
1019	TEST	1	C4MIm or BMIM	PF6	333.15	8.39	0.242	0.23368	3.43802	0.23278	3.80992
1020	TRAINING	1	C4MIm or BMIM	PF6	313.15	1.71	0.075	0.07738	3.17333	0.0779	3.86667
1021	TEST	1	C4MIm or BMIM	TFSI or NTf2	343.15	9.16	0.299	0.29228	2.24749	0.28742	3.87291
1022	TEST	9	C8MIm	TFSI or NTf2	353.15	2.907	0.1316	0.13145	0.11398	0.13671	3.88298
1023	TRAINING	12	EMIM or C2MIm	OAc or CH3COO	313.15	0.447	0.256514	0.24591	4.13398	0.2465	3.90397
1024	TRAINING	12	EMIM or C2MIm	OAc or CH3COO	313.15	0.957	0.311332	0.3215	3.26608	0.32351	3.9117
1025	TRAINING	9	C8MIm	TFSI or NTf2	323.15	1.111	0.0719	0.06578	8.51182	0.06908	3.92211
1026	TEST	5	EMIM or C2MIm	PF6	333.15	2.97	0.077	0.07861	2.09091	0.07397	3.93506
1027	TEST	15	DMEAH (N11H,CH2OH)	HCO2	303.2	0.252	0.0423	0.03996	5.53191	0.04063	3.94799
1028	TRAINING	4	C4MIm or BMIM	PF6	298.15	0.69	0.046	0.04731	2.84783	0.04782	3.95652
1029	TRAINING	1	C4MIm or BMIM	PF6	313.15	5.8	0.242	0.25124	3.81818	0.25158	3.95868
1030	TEST	12	EMIM or C2MIm	OAc or CH3COO	313.15	2.841	0.424636	0.40653	4.26392	0.40776	3.97426
1031	TRAINING	3	C4MIm or BMIM	MeSO4	298.1	1.002	0.138	0.13427	2.7029	0.13246	4.01449
1032	TEST	12	C6MIm or HMIM	OAc or CH3COO	333.15	0.538	0.301026	0.28719	4.59621	0.28889	4.03148
1033	TRAINING	12	EMIM or C2MIm	OAc or CH3COO	303.15	3.191	0.472854	0.48675	2.93881	0.49201	4.0512
1034	TRAINING	5	EMIM or C2MIm	PF6	353.15	3.356	0.068	0.07174	5.5	0.06524	4.05882
1035	TRAINING	12	EMIM or C2MIm	CH3CH2CO2	333.15	1.996	0.323878	0.33139	2.31925	0.33704	4.06373
1036	TRAINING	12	EMIM or C2MIm	CH3CH2CO2	333.15	0.808	0.241274	0.25375	5.17104	0.25108	4.06441
1037	TRAINING	15	MEDAH (CH2OH)2CH3NH	OAc or CH3COO	333.2	0.426	0.0277	0.02792	0.79422	0.02656	4.11552
1038	TRAINING	12	EMIM or C2MIm	OAc or CH3COO	313.15	2.547	0.410728	0.3942	4.02414	0.39378	4.12639
1039	TRAINING	6	C2OHMIM	BF4	353.15	8.45	0.102	0.10145	0.53922	0.09776	4.15686
1040	TRAINING	12	EMIM or C2MIm	CH3CH2CO2	313.15	1.772	0.401227	0.41477	3.3755	0.41797	4.17305
1041	TEST	1	C4MIm or BMIM	BF4	343.15	8.13	0.227	0.23649	4.18062	0.23648	4.17621
1042	TRAINING	12	EMIM or C2MIm	OAc or CH3COO	323.15	1.311	0.310362	0.32147	3.57918	0.32335	4.18493
1043	TRAINING	15	MEDAH (CH2OH)2CH3NH	HCO2	303.2	0.209	0.0203	0.01997	1.62562	0.01945	4.18719
1044	TEST	13	EMIM or C2MIm	(C2F5)3PF3 or TPTP	343.15	0.779	0.0255802	0.02182	14.6996	0.0245	4.2227
1045	TRAINING	15	DMEAH (N11H,CH2OH)	OAc or CH3COO	303.2	0.089	0.028	0.02996	7	0.02921	4.32143
1046	TRAINING	1	C4MIm or BMIM	PF6	333.15	7.26	0.213	0.20431	4.07981	0.20378	4.32864
1047	TEST	4	C4MIm or BMIM	PF6	343.15	3.1	0.09	0.08547	5.03333	0.0861	4.33333
1048	TRAINING	12	EMIM or C2MIm	CH3CH2CO2	303.15	2.652	0.506425	0.48053	5.1132	0.48447	4.3352
1049	TRAINING	1	C4MIm or BMIM	BF4	303.15	1.88	0.12	0.11716	2.36667	0.11479	4.34167
1050	TEST	2	C4MIm or BMIM	EtSO4	343.15	9.745	0.072	0.07291	1.26389	0.07516	4.38889
1051	TRAINING	6	C2OHMIM	BF4	333.15	2.77	0.045	0.04595	2.11111	0.04302	4.4
1052	TRAINING	5	EMIM or C2MIm	TFSI or NTf2	313.15	1.186	0.065	0.06584	1.29231	0.06214	4.4
1053	TRAINING	12	EMIM or C2MIm	CH3CH2CO2	323.15	0.553	0.356122	0.34221	3.90644	0.34034	4.43154
1054	TRAINING	10	C8MIm	PF6	303.15	1.923	0.1408	0.14587	3.60085	0.14704	4.43182
1055	TRAINING	12	EMIM or C2MIm	CH3CH2CO2	293.15	0.511	0.37344	0.35791	4.15864	0.35671	4.47998
1056	TEST	2	C4MIm or BMIM	EtSO4	333.15	1.363	0.014	0.01845	31.7857	0.01337	4.5
1057	TEST	6	C2OHMIM	BF4	303.15	1.64	0.048	0.04729	1.47917	0.04584	4.5
1058	TRAINING	2	C4MIm or BMIM	EtSO4	343.15	4.981	0.039	0.03939	1	0.04076	4.51282
1059	TEST	12	EMIM or C2MIm	OAc or CH3COO	323.15	0.527	0.240659	0.22719	5.59663	0.22976	4.52873
1060	TRAINING	6	C2OHMIM	BF4	343.15	7.55	0.099	0.09989	0.89899	0.1035	4.54545
1061	TRAINING	5	EMIM or C2MIm	PF6	338.15	3.073	0.075	0.07485	0.2	0.07157	4.57333
1062	TRAINING	12	EMIM or C2MIm	CH3CH2CO2	303.15	1.332	0.418296	0.44006	5.2029	0.43745	4.57894
1063	TEST	12	EMIM or C2MIm	CH3CH2CO2	323.15	0.387	0.279065	0.29035	4.04374	0.29194	4.6135
1064	TEST	15	MEDAH (CH2OH)2CH3NH	HCO2	303.2	1.1	0.0807	0.08212	1.7596	0.07697	4.62206
1065	TRAINING	5	EMIM or C2MIm	TFSI or NTf2	333.15	1.389	0.056	0.05442	2.82143	0.05859	4.625
1066	TRAINING	15	DMEAH (N11H,CH2OH)	HCO2	313.2	0.078	0.011	0.01241	12.8182	0.01151	4.63636
1067	TRAINING	12	C4MIm or BMIM	OAc or CH3COO	323.15	1.186	0.347398	0.36344	4.61768	0.36367	4.68389
1068	TEST	12	EMIM or C2MIm	OAc or CH3COO	313.15	1.259	0.333746	0.34818	4.32499	0.3495	4.7205
1069	TEST	12	C4MIm or BMIM	OAc or CH3COO	293.15	3.219	0.578971	0.60439	4.39044	0.60666	4.78251
1070	TRAINING	12	C4MIm or BMIM	OAc or CH3COO	323.15	1.544	0.373266	0.3904	4.59031	0.39118	4.79928
1071	TRAINING	13	EMIM or C2MIm	(C2F5)3PF3 or TPTP	303.15	0.604	0.0385031	0.0404	4.9266	0.03662	4.89079
1072	TRAINING	12	EMIM or C2MIm	CH3CH2CO2	313.15	1.158	0.351506	0.37337	6.22012	0.3688	4.92
1073	TRAINING	12	EMIM or C2MIm	OAc or CH3COO	293.15	0.516	0.308901	0.2887	6.53975	0.29368	4.92758
1074	TRAINING	1	C4MIm or BMIM	TFSI or NTf2	303.15	0.944	0.07	0.07238	3.4	0.07345	4.92857
1075	TRAINING	10	C8MIm	PF6	313.15	2.125	0.1327	0.13859	4.43858	0.13928	4.95855
1076	TRAINING	5	EMIM or C2MIm	TFSI or NTf2	353.15	1.569	0.049	0.04942	0.85714	0.04654	5.02041
1077	TRAINING	9	C6MIm or HMIM	TFSI or NTf2	313.15	5.459	0.3039	0.28943	4.76143	0.28858	5.04113
1078	TEST	6	C2OHMIM	BF4	353.15	4.42	0.055	0.05496	0.07273	0.05779	5.07273
1079	TRAINING	2	C4MIm or BMIM	EtSO4	313.15	2.694	0.037	0.03589	3	0.03888	5.08108
1080	TRAINING	12	EMIM or C2MIm	CH3CH2CO2	303.15	0.998	0.386887	0.41097	6.22468	0.40676	5.13651
1081	TRAINING	7	C2OHMIM	TFSI or NTf2	333.15	1.966	0.0644008	0.06091	5.41925	0.06772	5.15528
1082	TRAINING	2	C4MIm or BMIM	EtSO4	313.15	1.215	0.018	0.01846	2.55556	0.01706	5.22222
1083	TRAINING	1	C4MIm or BMIM	PF6	333.15	4.47	0.121	0.12792	5.71901	0.12738	5.27273
1084	TRAINING	1	C4MIm or BMIM	PF6	333.15	5.88	0.176	0.16714	5.03409	0.16671	5.27841
1085	TRAINING	2	C4MIm or BMIM	EtSO4	303.15	1.137	0.02	0.0199	0.5	0.02106	5.3
1086	TRAINING	7	C2OHMIM	PF6	313.15	1.444	0.0432166	0.04257	1.45833	0.04091	5.30093
1087	TRAINING	2	C4MIm or BMIM	EtSO4	323.15	6.727	0.068	0.06805	0.07353	0.06436	5.35294
1088	TRAINING	12	C4MIm or BMIM	OAc or CH3COO	303.15	0.478	0.32468	0.30648	5.60565	0.30726	5.36542
1089	TRAINING	8	C6MIm or HMIM	TFSI or NTf2	313.15	10.3	0.524	0.49752	5.05344	0.49572	5.39695
1090	TRAINING	6	C2OHMIM	BF4	303.15	1.36	0.039	0.03834	1.69231	0.03689	5.41026
1091	TRAINING	9	C6MIm or HMIM	TFSI or NTf2	303.15	4.863	0.324	0.30829	4.84877	0.30641	5.42901
1092	TEST	3	C4MIm or BMIM	MeSO4	298.1	0.257	0.044	0.04533	3.02273	0.04639	5.43182
1093	TRAINING	12	EMIM or C2MIm	CH3CH2CO2	333.15	0.558	0.216296	0.20653	4.51499	0.20422	5.58297
1094	TEST	12	EMIM or C2MIm	CH3CH2CO2	313.15	1.475	0.378106	0.40014	5.82737	0.39925	5.59198
1095	TEST	8	C6MIm or HMIM	TFSI or NTf2	303.15	8.75	0.533	0.49955	6.2758	0.50289	5.64916
1096	TEST	12	EMIM or C2MIm	CH3CH2CO2	323.15	0.591	0.371481	0.35295	4.98842	0.35047	5.65602
1097	TRAINING	7	C2OHMIM	PF6	343.15	3.683	0.0761666	0.07318	3.96325	0.07189	5.65617
1098	TRAINING	12	C4MIm or BMIM	OAc or CH3COO	333.15	0.121	0.187634	0.17592	6.24322	0.17702	5.65697
1099	TRAINING	2	C4MIm or BMIM	EtSO4	353.15	5.195	0.037	0.0385	4.05405	0.03489	5.7027
1100	TRAINING	9	C6MIm or HMIM	TFSI or NTf2	323.15	6.039	0.2846	0.26809	5.80112	0.26806	5.81167
1101	TRAINING	12	C4MIm or BMIM	OAc or CH3COO	333.15	0.295	0.230515	0.21647	6.09297	0.21708	5.82834
1102	TRAINING	12	EMIM or C2MIm	L-lactate	293.15	0.249	0.187703	0.17658	5.9259	0.17666	5.88328
1103	TRAINING	12	EMIM or C2MIm	CH3CH2CO2	333.15	2.646	0.357341	0.34312	3.9798	0.33583	6.01987
1104	TRAINING	9	C6MIm or HMIM	TFSI or NTf2	333.15	6.605	0.2616	0.24267	7.23624	0.24585	6.02064
1105	TEST	1	C4MIm or BMIM	PF6	333.15	5.45	0.146	0.15529	6.36301	0.15485	6.06164
1106	TRAINING	1	C4MIm or BMIM	PF6	333.15	6.42	0.171	0.18184	6.33918	0.18141	6.08772
1107	TRAINING	2	C4MIm or BMIM	EtSO4	343.15	3.148	0.028	0.02547	9.03571	0.02972	6.14286
1108	TRAINING	8	C6MIm or HMIM	PF6	303.15	1.38	0.067	0.06733	0.49254	0.07114	6.1791
1109	TRAINING	12	EMIM or C2MIm	L-lactate	323.15	0.077	0.0758696	0.08283	9.17413	0.08056	6.18215
1110	TRAINING	10	C8MIm	PF6	303.15	0.845	0.0672	0.06626	1.39881	0.06303	6.20536
1111	TRAINING	4	C4MIm or BMIM	PF6	313.15	1.15	0.056	0.05124	8.5	0.0525	6.25
1112	TRAINING	1	C4MIm or BMIM	PF6	333.15	7.27	0.192	0.20458	6.55208	0.20404	6.27083
1113	TEST	12	C4MIm or BMIM	OAc or CH3COO	293.15	0.346	0.332545	0.31	6.77941	0.31137	6.36744
1114	TEST	12	C6MIm or HMIM	OAc or CH3COO	303.15	0.405	0.352352	0.33012	6.30967	0.3299	6.37211
1115	TRAINING	12	EMIM or C2MIm	L-lactate	303.15	0.54	0.230745	0.21723	5.85723	0.21601	6.38595
1116	TRAINING	2	C4MIm or BMIM	EtSO4	353.15	3.295	0.025	0.02408	3.68	0.02661	6.44
1117	TRAINING	12	EMIM or C2MIm	L-lactate	323.15	0.272	0.131176	0.12434	5.21124	0.12248	6.62919
1118	TRAINING	13	EMIM or C2MIm	(C2F5)3PF3 or TPTP	323.15	0.657	0.0302053	0.03213	6.37205	0.03229	6.90176
1119	TEST	8	C6MIm or HMIM	BF4	323.15	1.46	0.066	0.0736	11.5152	0.07061	6.98485
1120	TEST	9	C6MIm or HMIM	TFSI or NTf2	343.15	7.147	0.2452	0.22895	6.62724	0.22801	7.0106
1121	TRAINING	10	C8MIm	PF6	323.15	1.037	0.0591	0.0585	1.01523	0.05495	7.022
1122	TRAINING	1	C4MIm or BMIM	PF6	333.15	4.24	0.13	0.12143	6.59231	0.12087	7.02308
1123	TEST	15	MEDAH (CH2OH)2CH3NH	HCO2	333.2	0.539	0.0216	0.02134	1.2037	0.02008	7.03704
1124	TRAINING	12	EMIM or C2MIm	CH3CH2CO2	323.15	0.648	0.393194	0.3683	6.33113	0.36502	7.16533
1125	TEST	2	C4MIm or BMIM	EtSO4	313.15	4.29	0.052	0.05444	4.69231	0.05579	7.28846
1126	TEST	9	C6MIm or HMIM	TFSI or NTf2	353.15	1.073	0.0368	0.03217	12.5815	0.03949	7.30978
1127	TEST	12	EMIM or C2MIm	OAc or CH3COO	293.15	3.208	0.51029	0.5304	3.94086	0.54762	7.31541
1128	TRAINING	12	EMIM or C2MIm	OAc or CH3COO	303.15	0.047	0.159632	0.14842	7.02344	0.14767	7.49327
1129	TRAINING	15	DMEAH (N11H,CH2OH)	HCO2	323.2	0.058	0.0093	0.00891	4.19355	0.01	7.52688
1130	TRAINING	4	C4MIm or BMIM	PF6	373.15	3.32	0.059	0.0598	1.35593	0.06348	7.59322
1131	TRAINING	8	C6MIm or HMIM	TFSI or NTf2	303.15	2.3	0.141	0.15363	8.95745	0.15174	7.61702
1132	TRAINING	12	EMIM or C2MIm	L-lactate	293.15	0.078	0.120465	0.13102	8.76206	0.12974	7.69951
1133	TRAINING	12	EMIM or C2MIm	CH3CH2CO2	323.15	0.678	0.404054	0.37603	6.93561	0.37238	7.83896
1134	TRAINING	12	EMIM or C2MIm	CH3CH2CO2	333.15	1.725	0.307488	0.32671	6.25128	0.3317	7.87411
1135	TRAINING	1	C4MIm or BMIM	PF6	333.15	8.23	0.212	0.22958	8.29245	0.22875	7.90094
1136	TRAINING	15	DMEAH (N11H,CH2OH)	HCO2	333.2	0.201	0.0128	0.01391	8.67187	0.01178	7.96875
1137	TRAINING	13	EMIM or C2MIm	(C2F5)3PF3 or TPTP	353.15	1.376	0.0386059	0.03756	2.70924	0.0417	8.0145
1138	TEST	2	C4MIm or BMIM	EtSO4	333.15	11.56	0.092	0.09033	1.81522	0.09954	8.19565
1139	TRAINING	4	C4MIm or BMIM	PF6	343.15	1.2	0.035	0.0375	7.14286	0.03789	8.25714
1140	TRAINING	8	C6MIm or HMIM	TFSI or NTf2	313.15	2.66	0.133	0.14294	7.47368	0.144	8.27068
1141	TRAINING	12	EMIM or C2MIm	CH3CH2CO2	303.15	0.125	0.238399	0.21611	9.34951	0.21868	8.27149
1142	TRAINING	6	C2OHMIM	BF4	333.15	1.55	0.025	0.02289	8.44	0.02291	8.36
1143	TRAINING	1	C4MIm or BMIM	PF6	333.15	2.89	0.09	0.08297	7.81111	0.0824	8.44444
1144	TRAINING	8	C6MIm or HMIM	TFSI or NTf2	303.15	4.38	0.257	0.28104	9.35409	0.27878	8.47471
1145	TRAINING	12	EMIM or C2MIm	CH3CH2CO2	323.15	0.715	0.416922	0.38524	7.59895	0.38118	8.57275
1146	TRAINING	5	EMIM or C2MIm	PF6	338.15	1.499	0.037	0.03658	1.13514	0.0402	8.64865
1147	TEST	12	C6MIm or HMIM	OAc or CH3COO	323.15	0.377	0.297805	0.27212	8.62464	0.27201	8.66157
1148	TEST	9	C6MIm or HMIM	TFSI or NTf2	303.15	3.15	0.2245	0.20752	7.56347	0.20505	8.6637
1149	TRAINING	1	C4MIm or BMIM	BF4	313.15	0.718	0.038	0.03303	13.079	0.0347	8.68421
1150	TRAINING	15	MEDAH (CH2OH)2CH3NH	OAc or CH3COO	303.2	0.097	0.0193	0.01937	0.36269	0.02098	8.70466
1151	TRAINING	12	EMIM or C2MIm	CH3CH2CO2	313.15	0.512	0.27849	0.25924	6.91239	0.25424	8.70778
1152	TEST	4	C4MIm or BMIM	PF6	343.15	36.5	0.631	0.62269	1.31696	0.68598	8.71315
1153	TEST	8	C6MIm or HMIM	TFSI or NTf2	323.15	3.03	0.126	0.13724	8.92063	0.13715	8.84921
1154	TRAINING	12	EMIM or C2MIm	CH3CH2CO2	333.15	1.068	0.263111	0.28796	9.44416	0.28678	8.99568
1155	TEST	15	MEDAH (CH2OH)2CH3NH	OAc or CH3COO	333.2	0.279	0.0192	0.01901	0.98958	0.01742	9.27083
1156	TRAINING	9	C6MIm or HMIM	TFSI or NTf2	313.15	3.532	0.21	0.19022	9.41905	0.19052	9.27619
1157	TRAINING	1	C4MIm or BMIM	PF6	303.15	1.65	0.075	0.08247	9.96	0.08199	9.32
1158	TRAINING	15	MEDAH (CH2OH)2CH3NH	OAc or CH3COO	323.2	0.177	0.0164	0.01661	1.28049	0.01793	9.32927
1159	TRAINING	7	C2OHMIM	TfO OR TFMS	323.15	1.278	0.0473614	0.04783	0.90717	0.04297	9.34599
1160	TEST	12	C4MIm or BMIM	OAc or CH3COO	323.15	0.452	0.272575	0.24757	9.17349	0.24697	9.39361
1161	TRAINING	12	EMIM or C2MIm	OAc or CH3COO	303.15	0.323	0.250921	0.22404	10.7131	0.22733	9.40189
1162	TRAINING	12	C6MIm or HMIM	OAc or CH3COO	293.15	0.387	0.363455	0.32763	9.85672	0.3291	9.45227
1163	TRAINING	12	EMIM or C2MIm	CH3CH2CO2	323.15	0.768	0.43442	0.39783	8.42273	0.39327	9.47241
1164	TEST	1	C4MIm or BMIM	TFSI or NTf2	333.15	1.33	0.055	0.0555	0.90909	0.04977	9.50909
1165	TEST	7	C2OHMIM	TFSI or NTf2	323.15	1.838	0.0686596	0.06692	2.59098	0.07529	9.59243
1166	TRAINING	8	C6MIm or HMIM	TFSI or NTf2	333.15	3.42	0.118	0.1273	7.88136	0.12934	9.61017
1167	TEST	2	C4MIm or BMIM	EtSO4	353.15	7.694	0.055	0.05564	1.16364	0.0497	9.63636
1168	TEST	12	EMIM or C2MIm	CH3CH2CO2	333.15	1.449	0.291303	0.31682	8.75976	0.31943	9.65574
1169	TRAINING	15	DMEAH (N11H,CH2OH)	HCO2	303.2	0.062	0.0116	0.01262	8.7931	0.01273	9.74138
1170	TRAINING	7	C2OHMIM	TfO OR TFMS	333.15	1.379	0.0430811	0.04408	2.27378	0.0473	9.74478
1171	TRAINING	8	C6MIm or HMIM	TFSI or NTf2	333.15	6.58	0.223	0.24161	8.34529	0.24479	9.7713
1172	TRAINING	9	C6MIm or HMIM	TFSI or NTf2	323.15	3.904	0.1957	0.17605	10.0409	0.17617	9.97956
1173	TRAINING	15	DMEAH (N11H,CH2OH)	OAc or CH3COO	333.2	0.08	0.0106	0.00945	10.8491	0.01166	10
1174	TRAINING	6	C2OHMIM	BF4	353.15	1.65	0.02	0.01939	3.05	0.01799	10.05
1175	TRAINING	12	C6MIm or HMIM	OAc or CH3COO	313.15	0.241	0.296687	0.2645	10.8488	0.26681	10.0702
1176	TEST	12	EMIM or C2MIm	L-lactate	303.15	0.182	0.151113	0.13782	8.79684	0.13588	10.0807
1177	TRAINING	8	C6MIm or HMIM	TFSI or NTf2	313.15	5.1	0.246	0.27155	10.3862	0.27085	10.1016
1178	TRAINING	8	C6MIm or HMIM	TFSI or NTf2	343.15	7.33	0.212	0.23436	10.5472	0.2335	10.1415
1179	TRAINING	15	MEDAH (CH2OH)2CH3NH	HCO2	303.2	0.101	0.0103	0.01088	5.63107	0.00925	10.1942
1180	TRAINING	9	C6MIm or HMIM	TFSI or NTf2	343.15	4.609	0.167	0.15102	9.56886	0.14991	10.2335
1181	TRAINING	12	C4MIm or BMIM	OAc or CH3COO	293.15	0.205	0.298768	0.26786	10.345	0.26819	10.2346
1182	TRAINING	12	EMIM or C2MIm	OAc or CH3COO	313.15	0.237	0.221748	0.20067	9.50556	0.19905	10.2361
1183	TRAINING	1	C4MIm or BMIM	BF4	303.15	0.608	0.039	0.04124	5.74359	0.04303	10.3333
1184	TRAINING	12	C4MIm or BMIM	OAc or CH3COO	293.15	0.079	0.249967	0.22508	9.95619	0.22408	10.3562
1185	TRAINING	9	C6MIm or HMIM	TFSI or NTf2	303.15	2.276	0.1679	0.15233	9.27338	0.15046	10.3871
1186	TRAINING	12	C6MIm or HMIM	OAc or CH3COO	313.15	0.063	0.232291	0.20663	11.0468	0.20814	10.3968
1187	TEST	1	C4MIm or BMIM	PF6	333.15	1.37	0.044	0.03941	10.4318	0.0394	10.4545
1188	TRAINING	15	MEDAH (CH2OH)2CH3NH	HCO2	333.2	0.331	0.0139	0.01357	2.3741	0.01243	10.5755
1189	TEST	7	C2OHMIM	TFSI or NTf2	353.15	2.192	0.0575773	0.06238	8.29861	0.05143	10.7118
1190	TRAINING	12	EMIM or C2MIm	CH3CH2CO2	293.15	0.277	0.324804	0.29019	10.6568	0.28996	10.7276
1191	TRAINING	8	C6MIm or HMIM	TFSI or NTf2	323.15	5.83	0.234	0.2593	10.812	0.25931	10.8162
1192	TEST	12	EMIM or C2MIm	OAc or CH3COO	313.15	0.087	0.177629	0.16244	8.55107	0.1584	10.8255
1193	TRAINING	12	EMIM or C2MIm	CH3CH2CO2	323.15	0.324	0.244758	0.26845	9.67996	0.27171	11.0119
1194	TRAINING	12	C4MIm or BMIM	OAc or CH3COO	303.15	0.058	0.203037	0.17991	11.3907	0.17964	11.5237
1195	TEST	9	C6MIm or HMIM	TFSI or NTf2	313.15	2.543	0.1554	0.1363	12.2909	0.13747	11.538
1196	TRAINING	9	C6MIm or HMIM	TFSI or NTf2	343.15	3.299	0.1236	0.1094	11.4887	0.10907	11.7557
1197	TEST	9	C6MIm or HMIM	TFSI or NTf2	333.15	4.262	0.1821	0.15816	13.1466	0.16066	11.7737
1198	TEST	9	C6MIm or HMIM	TFSI or NTf2	323.15	2.804	0.1438	0.12687	11.7733	0.12666	11.9193
1199	TEST	12	EMIM or C2MIm	CH3CH2CO2	333.15	3.239	0.383125	0.38713	1.04544	0.33697	12.0469
1200	TRAINING	12	C4MIm or BMIM	OAc or CH3COO	303.15	0.239	0.274249	0.24068	12.2404	0.24114	12.0727
1201	TRAINING	2	C4MIm or BMIM	EtSO4	343.15	1.431	0.013	0.01498	15.2308	0.01143	12.0769
1202	TRAINING	12	C6MIm or HMIM	OAc or CH3COO	333.15	0.298	0.266569	0.23307	12.5666	0.2343	12.1052
1203	TRAINING	12	C4MIm or BMIM	OAc or CH3COO	313.15	0.326	0.283426	0.24725	12.7637	0.24892	12.1745
1204	TRAINING	12	EMIM or C2MIm	OAc or CH3COO	323.15	0.303	0.210134	0.18308	12.8748	0.18447	12.2133
1205	TRAINING	8	C6MIm or HMIM	TFSI or NTf2	343.15	3.8	0.111	0.12542	12.991	0.12475	12.3874
1206	TRAINING	9	C6MIm or HMIM	TFSI or NTf2	303.15	1.466	0.1118	0.09857	11.8336	0.09785	12.4776
1207	TEST	7	C2OHMIM	TFSI or NTf2	303.15	1.562	0.0798293	0.07526	5.68922	0.06982	12.5063
1208	TRAINING	6	C2OHMIM	BF4	353.15	3.18	0.039	0.04051	3.87179	0.04393	12.641
1209	TRAINING	12	C6MIm or HMIM	OAc or CH3COO	303.15	0.2	0.306184	0.26813	12.4285	0.26688	12.8368
1210	TRAINING	12	C6MIm or HMIM	OAc or CH3COO	303.15	0.058	0.246816	0.21739	11.9223	0.21502	12.8825
1211	TEST	12	EMIM or C2MIm	CH3CH2CO2	293.15	0.083	0.254304	0.22046	13.3083	0.22134	12.9623
1212	TRAINING	9	C6MIm or HMIM	TFSI or NTf2	343.15	2.123	0.0819	0.07083	13.5165	0.07125	13.0037
1213	TRAINING	9	C6MIm or HMIM	TFSI or NTf2	333.15	3.056	0.1332	0.11399	14.4219	0.11575	13.1006
1214	TRAINING	4	C4MIm or BMIM	PF6	373.15	1.35	0.025	0.02442	2.32	0.0215	14
1215	TEST	12	EMIM or C2MIm	OAc or CH3COO	293.15	0.232	0.255949	0.21789	14.8698	0.21939	14.2838
1216	TRAINING	12	EMIM or C2MIm	OAc or CH3COO	303.15	0.146	0.208858	0.17769	14.9231	0.17877	14.406
1217	TRAINING	9	C6MIm or HMIM	TFSI or NTf2	343.15	0.999	0.0391	0.03309	15.3708	0.03344	14.4757
1218	TRAINING	12	EMIM or C2MIm	OAc or CH3COO	293.15	0.064	0.192881	0.16645	13.7033	0.16388	15.0357
1219	TRAINING	6	C2OHMIM	BF4	323.15	1.42	0.026	0.0265	1.92308	0.02994	15.1539
1220	TEST	15	DMEAH (N11H,CH2OH)	OAc or CH3COO	303.2	0.045	0.0158	0.01931	22.2152	0.01823	15.3797
1221	TRAINING	9	C6MIm or HMIM	TFSI or NTf2	303.15	0.685	0.0539	0.04464	17.18	0.0455	15.5844
1222	TRAINING	9	C6MIm or HMIM	TFSI or NTf2	313.15	1.637	0.104	0.08563	17.6635	0.08758	15.7885
1223	TRAINING	12	EMIM or C2MIm	OAc or CH3COO	323.15	0.116	0.164531	0.13887	15.5966	0.13846	15.8458
1224	TEST	6	C2OHMIM	BF4	343.15	3	0.041	0.03938	3.95122	0.03447	15.9268
1225	TRAINING	12	C4MIm or BMIM	OAc or CH3COO	333.15	0.036	0.133336	0.15361	15.2052	0.15492	16.1876
1226	TRAINING	9	C6MIm or HMIM	TFSI or NTf2	323.15	1.805	0.0962	0.08174	15.0312	0.08062	16.1954
1227	TRAINING	12	C6MIm or HMIM	OAc or CH3COO	293.15	0.036	0.234949	0.19641	16.4032	0.19655	16.3436
1228	TEST	8	C6MIm or HMIM	TFSI or NTf2	303.15	1.61	0.092	0.10802	17.413	0.10707	16.3804
1229	TRAINING	12	C6MIm or HMIM	OAc or CH3COO	333.15	0.14	0.227864	0.18967	16.7617	0.19007	16.5861
1230	TRAINING	12	C6MIm or HMIM	OAc or CH3COO	323.15	0.123	0.237721	0.19959	16.0401	0.19794	16.7342
1231	TRAINING	9	C6MIm or HMIM	TFSI or NTf2	333.15	1.966	0.0887	0.0734	17.2492	0.07374	16.8658
1232	TRAINING	15	MEDAH (CH2OH)2CH3NH	HCO2	313.2	0.079	0.0061	0.00559	8.36066	0.00713	16.8852
1233	TEST	15	DMEAH (N11H,CH2OH)	HCO2	333.2	0.089	0.0065	0.00927	42.6154	0.00536	17.5385
1234	TRAINING	12	EMIM or C2MIm	CH3CH2CO2	303.15	0.017	0.153205	0.17577	14.7285	0.18065	17.9137
1235	TEST	12	C6MIm or HMIM	OAc or CH3COO	293.15	0.173	0.309545	0.25282	18.3253	0.25372	18.0345
1236	TRAINING	8	C6MIm or HMIM	TFSI or NTf2	313.15	1.87	0.085	0.09872	16.1412	0.10049	18.2235
1237	TRAINING	12	EMIM or C2MIm	CH3CH2CO2	333.15	0.336	0.184993	0.15063	18.5754	0.15077	18.4997
1238	TRAINING	12	EMIM or C2MIm	L-lactate	303.15	0.044	0.0833332	0.10125	21.5002	0.09877	18.5242
1239	TEST	12	C4MIm or BMIM	OAc or CH3COO	313.15	0.142	0.237725	0.192	19.2345	0.19365	18.5404
1240	TRAINING	12	C4MIm or BMIM	OAc or CH3COO	323.15	0.226	0.234602	0.18928	19.3187	0.18823	19.7663
1241	TRAINING	12	EMIM or C2MIm	CH3CH2CO2	293.15	0.011	0.16041	0.19115	19.1637	0.1925	20.0053
1242	TRAINING	8	C6MIm or HMIM	TFSI or NTf2	323.15	2.13	0.079	0.09641	22.038	0.09567	21.1013
1243	TEST	12	EMIM or C2MIm	CH3CH2CO2	313.15	0.244	0.227231	0.17928	21.1022	0.17851	21.441
1244	TRAINING	12	EMIM or C2MIm	OAc or CH3COO	323.15	0.021	0.0916808	0.1136	23.9082	0.11194	22.0976
1245	TEST	8	C6MIm or HMIM	TFSI or NTf2	333.15	2.4	0.074	0.08946	20.8919	0.09049	22.2838
1246	TRAINING	9	C6MIm or HMIM	TFSI or NTf2	323.15	0.846	0.0442	0.0373	15.6109	0.0343	22.3982
1247	TRAINING	12	C6MIm or HMIM	OAc or CH3COO	323.15	0.013	0.129783	0.16239	25.1245	0.1597	23.0518
1248	TEST	5	EMIM or C2MIm	PF6	343.15	1.541	0.036	0.03932	9.22222	0.04436	23.2222
1249	TRAINING	12	C4MIm or BMIM	OAc or CH3COO	323.15	0.098	0.194253	0.15048	22.534	0.14904	23.2753
1250	TRAINING	15	MEDAH (CH2OH)2CH3NH	HCO2	333.2	0.141	0.0061	0.00608	0.32787	0.00753	23.4426
1251	TRAINING	12	EMIM or C2MIm	CH3CH2CO2	323.15	0.248	0.19871	0.24031	20.9353	0.24586	23.7283
1252	TEST	7	C2OHMIM	PF6	343.15	1.74	0.0366961	0.0254	30.7902	0.02781	24.2234
1253	TRAINING	3	C4MIm or BMIM	MeSO4	298.1	0.108	0.022	0.02532	15.0909	0.0274	24.5454
1254	TRAINING	9	C6MIm or HMIM	TFSI or NTf2	333.15	0.924	0.0421	0.03389	19.5012	0.03159	24.9644
1255	TRAINING	9	C6MIm or HMIM	TFSI or NTf2	313.15	0.767	0.0503	0.03526	29.9006	0.03769	25.0696
1256	TRAINING	12	C4MIm or BMIM	OAc or CH3COO	293.15	0.009	0.156807	0.1991	26.9715	0.19716	25.7343
1257	TRAINING	12	EMIM or C2MIm	CH3CH2CO2	313.15	0.054	0.154656	0.10812	30.09	0.11235	27.3549
1258	TRAINING	12	EMIM or C2MIm	OAc or CH3COO	293.15	0.014	0.111865	0.14965	33.7769	0.14552	30.085
1259	TEST	8	C6MIm or HMIM	TFSI or NTf2	343.15	2.67	0.068	0.08895	30.8088	0.08906	30.9706
1260	TRAINING	12	C6MIm or HMIM	OAc or CH3COO	303.15	0.005	0.145765	0.1967	34.9434	0.19382	32.9677
1261	TRAINING	12	EMIM or C2MIm	OAc or CH3COO	313.15	0.014	0.102367	0.14191	38.629	0.13641	33.2562
1262	TEST	13	EMIM or C2MIm	(C2F5)3PF3 or TPTP	353.15	0.781	0.0219759	0.01979	9.94673	0.02931	33.3735
1263	TEST	12	EMIM or C2MIm	OAc or CH3COO	333.15	0.049	0.103189	0.13792	33.6579	0.13764	33.3865
1264	TEST	4	C4MIm or BMIM	PF6	373.15	24.9	0.357	0.30779	13.7843	0.22704	36.4034
1265	TEST	12	EMIM or C2MIm	CH3CH2CO2	333.15	0.109	0.131248	0.07789	40.6544	0.0831	36.6849
1266	TRAINING	12	EMIM or C2MIm	OAc or CH3COO	303.15	0.009	0.0975408	0.13651	39.9517	0.13494	38.3421
1267	TRAINING	12	C6MIm or HMIM	OAc or CH3COO	313.15	0.006	0.134046	0.18599	38.7507	0.18712	39.5936
1268	TRAINING	12	C4MIm or BMIM	OAc or CH3COO	303.15	0.005	0.111818	0.16018	43.2509	0.1596	42.7322
1269	TRAINING	8	C6MIm or HMIM	TFSI or NTf2	313.15	1.13	0.04	0.05626	40.65	0.05855	46.375
1270	TRAINING	8	C6MIm or HMIM	TFSI or NTf2	303.15	0.974	0.044	0.06424	46	0.06449	46.5682
1271	TRAINING	12	C6MIm or HMIM	OAc or CH3COO	293.15	0.003	0.122002	0.18176	48.9816	0.18167	48.9078
1272	TRAINING	8	C6MIm or HMIM	TFSI or NTf2	323.15	1.29	0.036	0.05775	60.4167	0.05576	54.8889
1273	TRAINING	12	C4MIm or BMIM	OAc or CH3COO	313.15	0.003	0.0900254	0.14372	59.6439	0.14513	61.2101
1274	TRAINING	12	C6MIm or HMIM	OAc or CH3COO	333.15	0.006	0.089997	0.14755	63.9499	0.14682	63.1388
1275	TEST	15	MEDAH (CH2OH)2CH3NH	HCO2	323.2	0.145	0.0085	0.01161	36.5882	0.01399	64.5882
1276	TRAINING	8	C6MIm or HMIM	TFSI or NTf2	333.15	1.45	0.032	0.05388	68.375	0.05312	66
1277	TRAINING	12	EMIM or C2MIm	CH3CH2CO2	323.15	0.137	0.12055	0.19568	62.3224	0.20515	70.1781
1278	TEST	4	C4MIm or BMIM	PF6	403.15	70.2	0.545	0.75051	37.7083	0.97262	78.4624
1279	TRAINING	12	C4MIm or BMIM	OAc or CH3COO	323.15	0.004	0.0640207	0.11912	86.0648	0.11732	83.2532
1280	TRAINING	8	C6MIm or HMIM	TFSI or NTf2	343.15	1.61	0.029	0.0538	85.5172	0.05434	87.3793
1281	TEST	12	C4MIm or BMIM	OAc or CH3COO	333.15	0.008	0.067654	0.14589	115.641	0.14726	117.666
1282	TEST	12	C4MIm or BMIM	OAc or CH3COO	293.15	0.001	0.0739873	0.19602	164.937	0.19397	162.167

## Sheet: Reference
1	Jalili A H, Rahmati-Rostami M, Ghotbi C, et al. Solubility of H2S in ionic liquids [bmim][PF6],[bmim][BF4], and [bmim][Tf2N][J]. Journal of Chemical & Engineering Data, 2009, 54(6): 1844-1849.
2	Jalili A H, Mehdizadeh A, Shokouhi M, et al. Solubility and diffusion of CO 2 and H 2 S in the ionic liquid 1-ethyl-3-methylimidazolium ethylsulfate[J]. The Journal of Chemical Thermodynamics, 2010, 42(10): 1298-1303.
3	Shiflett M B, Niehaus A M S, Yokozeki A. Separation of CO2 and H2S using room-temperature ionic liquid [bmim][MeSO4][J]. Journal of Chemical & Engineering Data, 2010, 55(11): 4785-4793.
4	Jou F Y, Mather A E. Solubility of hydrogen sulfide in [bmim][PF6][J]. International journal of thermophysics, 2007, 28(2): 490-495.
5	Solubility of H2S in Ionic Liquids 1-Ethyl-3-methylimidazolium Hexafluorophosphate ([emim][PF6]) and 1-Ethyl-3-methylimidazolium Bis (trifluoromethyl) sulfonylimide ([emim][Tf2N])[J]. Journal of Chemical & Engineering Data, 2010, 55(12): 5839-5845
6	Shokouhi M, Adibi M, Jalili A H, et al. Solubility and diffusion of H2S and CO2 in the ionic liquid 1-(2-hydroxyethyl)-3-methylimidazolium tetrafluoroborate[J]. Journal of Chemical & Engineering Data, 2009, 55(4): 1663-1668.
7	Sakhaeinia H, Taghikhani V, Jalili A H, et al. Solubility of H 2 S in 1-(2-hydroxyethyl)-3-methylimidazolium ionic liquids with different anions[J]. Fluid Phase Equilibria, 2010, 298(2): 303-309.
8	Rahmati-Rostami M, Ghotbi C, Hosseini-Jenab M, et al. Solubility of H 2 S in ionic liquids [hmim][PF 6],[hmim][BF 4], and [hmim][Tf 2 N][J]. The Journal of Chemical Thermodynamics, 2009, 41(9): 1052-1055.
9	Jalili A H, Safavi M, Ghotbi C, et al. Solubility of CO2, H2S, and their mixture in the ionic liquid 1-octyl-3-methylimidazolium bis (trifluoromethyl) sulfonylimide[J]. The Journal of Physical Chemistry B, 2012, 116(9): 2758-2774.
10	Study of the solubility of CO 2, H 2 S and their mixture in the ionic liquid 1-octyl-3-methylimidazolium hexafluorophosphate: Experimental and modelling[J]. The Journal of Chemical Thermodynamics, 2013, 65: 220-232.
11	Pomelli C S, Chiappe C, Vidis A, et al. Influence of the interaction between hydrogen sulfide and ionic liquids on solubility: experimental and theoretical investigation[J]. The Journal of Physical Chemistry B, 2007, 111(45): 13014-13019.
12	Huang K, Cai D N, Chen Y L, et al. Thermodynamic validation of 1‐alkyl‐3‐methylimidazolium carboxylates as task‐specific ionic liquids for H2S absorption[J]. AIChE Journal, 2013, 59(6): 2227-2235.
13	Jalili A H, Shokouhi M, Maurer G, et al. Solubility of CO 2 and H 2 S in the ionic liquid 1-ethyl-3-methylimidazolium tris (pentafluoroethyl) trifluorophosphate[J]. The Journal of Chemical Thermodynamics, 2013, 67: 55-62.
14	Handy H, Santoso A, Widodo A, et al. H2S–CO2 Separation using Room Temperature Ionic Liquid [BMIM][Br][J]. Separation Science and Technology, 2014, 49(13): 2079-2084.
15	Huang K, Zhang X M, Xu Y, et al. Protic ionic liquids for the selective absorption of H2S from CO2: Thermodynamic analysis[J]. AIChE Journal, 2014, 60(12): 4232-4240.
